# Supplementary material for: Correlation Analysis of Protein Expression of 10 HDAC/Sirtuin Isoenzymes with Sensitivities of 23 Anticancer Drugs in 17 Cancer Cell Lines and Potentiation of Drug Activity by Co-Treatment with HDAC Inhibitors
Source: MDPI journal article supplement (doi:10.3390/cancers14010187), 2021-12-31

# **Correlation Analysis of Protein Expression of 10 HDAC/Sirtuin Isoenzymes with Sensitivities of 23 Anticancer Drugs in 17 Cancer Cell Lines and Potentiation of Drug Activity by Co-Treatment with HDAC Inhibitors**

**Steven Behnisch-Cornwell <sup>†</sup>, Christoph W. Grathwol, Lukas Schulig, Anika Voigt, Daniel Baecker, Andreas Link and Patrick J. Bednarski \***

Department of Pharmaceutical/Medicinal Chemistry, Institute of Pharmacy, University of Greifswald, Friedrich-Ludwig-Jahn-Straße 17, 17489 Greifswald, Germany; steven.behnisch@web.de (S.B.-C.); christoph.grathwol@kit.edu (C.W.G.); lukas.schulig@uni-greifswald.de (L.S.); anika.voigt@uni-greifswald.de (A.V.); daniel.baecker@uni-greifswald.de (D.B.); link@uni-greifswald.de (A.L.)

\* Correspondence: bednarsk@uni-greifswald.de; Tel.: +49-3834-86-4883

<sup>†</sup> Present address: AstraZeneca GmbH, Tinsdaler Weg 183, 22880 Wedel, Germany.

**Table S1.** Relative HDAC/Sirt isoenzyme protein expression of various cancer cell lines.

**Table S2.** R and p-values of Pearson correlation matrix for HDAC isoenzyme protein expression.

**Table S3.** R and p-values of Spearman correlation matrix for HDAC isoenzyme protein expression.

**Table S4.** R and p-values of Pearson correlation matrix for HDAC isoenzyme mRNA expression with data of the NCI 60 cancer cell line program.

**Table S5.** Doubling times in hours of cancer cell lines.

**Table S6.** R and p-values of univariate correlation of HDAC isoenzyme protein expression with anticancer drug potency expressed as GI<sub>50</sub> values and the doubling time of cancer cells.

**Table S7.** R and p-values of Pearson correlation of HDAC isoenzyme mRNA expression with data of the NCI 60 cancer cell line program with anticancer drug potency expressed as GI<sub>50</sub> values.

**Table S8.** Localization of HDAC isoenzymes across the chromosomes and corresponding reference sequence; from on UCSC Genome Browser.

**Figure S1.** Representative electropherogram showing the total protein content of the panel of 17 cancer cell lines used as internal controls in all Western blotting, as developed according to the TGX Stain Free Gels systems from Bio-Rad.

**Figure S2.** Western blots for the panel of 17 cancer cell lines for HDAC1, marked with antibody #5356 from Cell Signaling Technology.

**Figure S3.** Western blots for the panel of 17 cancer cell lines for HDAC2, marked with antibody #5113 from Cell Signaling Technology.

**Figure S4.** Western blots for the panel of 17 cancer cell lines for HDAC4, marked with antibody #7628 from Cell Signaling Technology.

**Figure S5.** Western blots for the panel of 17 cancer cell lines for HDAC6, marked with antibody #7558 from Cell Signaling Technology.

**Figure S6.** Western blots for the panel of 17 cancer cell lines for Sirt1, marked with antibody #9475 from Cell Signaling Technology.

**Figure S7.** Western blots for the panel of 17 cancer cell lines for Sirt2, marked with antibody #12650 from Cell Signaling Technology.

**Figure S8.** Western blots for the panel of 17 cancer cell lines for Sirt3, marked with antibody #5490 from Cell Signaling Technology.

**Figure S9.** Western blots for the panel of 17 cancer cell lines for Sirt5, marked with antibody #8782 from Cell Signaling Technology.

**Figure S10.** Western blots for the panel of 17 cancer cell lines for Sirt6, marked with antibody #12486 from Cell Signaling Technology.

**Figure S11.** Western blots for the panel of 17 cancer cell lines for Sirt7, marked with antibody #5360 from Cell Signaling Technology.

**Figure S12.** Univariate correlation matrix of the Spearman correlation coefficients for the expression of HDAC/Sirt isoenzyme proteins.

**Figure S13.** Univariate correlation matrix of the Spearman correlation coefficients with the NCI data for the expression of HDAC/Sirt isoenzyme mRNA.

**Figure S14.** Univariate correlation matrix of the Spearman correlation coefficients for the expression of the HDAC/Sirt isoenzyme protein with anticancer drug potency expressed as GI<sub>50</sub> values and the doubling time of cancer cells.

**Figure S15.** Univariate correlation matrix of the Spearman correlation coefficients with the NCI data for the expression of the HDAC/Sirt isoenzyme mRNA with anticancer drug potency expressed as GI<sub>50</sub>.

**Figure S16.** Univariate correlation matrix of the Pearson with FDR correction correlation for the expression of HDAC/Sirt isoenzyme proteins.

**Figure S17.** Univariate correlation matrix of the Pearson with FDR correction correlation with the NCI data for the expression of HDAC/Sirt isoenzyme mRNA.

**Figure S18.** Univariate correlation matrix of the Pearson with FDR correction correlation for the expression of the HDAC/Sirt isoenzyme protein with anticancer drug potency expressed as GI<sub>50</sub> values and the doubling time of cancer cells.

**Figure S19.** Univariate correlation matrix of the Pearson with FDR correction correlation for the expression of the HDAC/Sirt isoenzyme protein with anticancer drug potency expressed as GI<sub>50</sub>.

**Table S1.** Relative HDAC/Sirt isoenzyme protein expression of various cancer cell lines (relative to the mean expression over all cell lines) of  $n \geq 3$  independent determinations.

| <b>HDAC1</b>   | EFM-19    | MCF-7     | MT-3   | SiSo       | Kyse-70   | Kyse-510  | Kyse-520 | A427      | EPLC-272H |
|----------------|-----------|-----------|--------|------------|-----------|-----------|----------|-----------|-----------|
| 19_1_19        | 0.7098    | 1.4577    | 1.1490 | 0.6941     | 1.1442    | 1.6578    | 1.0719   | 2.2210    | 1.2739    |
| 19_1_26        | 1.1100    | 1.0000    | 1.0600 | 0.5000     | 0.8700    | 0.6500    | 1.0100   | 0.7700    | 1.5200    |
| 19_1_30        | 0.4700    | 2.1000    | 0.6900 | 0.4400     | 1.1200    | 1.2000    | 1.2000   | 2.8000    | 1.2600    |
| 19_1_32        | 0.5170    | 1.7850    | 1.4300 | 0.6460     | 0.9490    | 1.1800    | 1.0940   | 2.1200    | 1.3600    |
| 19_1_45        | 0.5980    | 2.2470    | 1.6030 | 0.6380     | 0.9710    | 1.2930    | 0.8380   | (outlier) | 1.0070    |
| Mean           | 0.6810    | 1.7180    | 1.1860 | 0.5836     | 1.0110    | 1.1960    | 1.0430   | 1.9780    | 1.2840    |
| Std. Deviation | 0.2565    | 0.5034    | 0.3524 | 0.1080     | 0.1172    | 0.3609    | 0.1334   | 0.8591    | 0.1863    |
| <b>HDAC1</b>   | LCLC-103H | BHY       | DanG   | Pa-Tu-8902 | YAPC      | 5637      | RT-4     | RT-112    |           |
| 19_1_19        | 1.0092    | 1.6329    | 1.0189 | (outlier)  | 0.9998    | (outlier) | 0.3375   | 0.4917    |           |
| 19_1_26        | 1.1400    | 2.2700    | 1.3400 | 1.0400     | 1.6100    | 0.3600    | 0.2700   | 0.4700    |           |
| 19_1_30        | 1.0300    | 1.6100    | 0.6900 | 0.3300     | (outlier) | 1.0200    | 0.4100   | 0.4400    |           |
| 19_1_32        | 0.6740    | 1.5270    | 0.9500 | 0.3860     | 0.9710    | 0.4010    | 0.2610   | 0.7500    |           |
| 19_1_45        | 1.1950    | 1.8620    | 1.1840 | 0.9350     | 1.2010    | 0.3620    | 0.2630   | 0.6460    |           |
| Mean           | 1.0100    | 1.7800    | 1.0370 | 0.6728     | 1.1950    | 0.5358    | 0.3083   | 0.5595    |           |
| Std. Deviation | 0.2027    | 0.3006    | 0.2458 | 0.3667     | 0.2947    | 0.3234    | 0.0651   | 0.1329    |           |
|                |           |           |        |            |           |           |          |           |           |
| <b>HDAC2</b>   | EFM-19    | MCF-7     | MT-3   | SiSo       | Kyse-70   | Kyse-510  | Kyse-520 | A427      | EPLC-272H |
| 19_1_26        | 1.2100    | 0.7100    | 1.5800 | 0.8500     | 1.1000    | 1.9600    | 0.8300   | 1.0000    | 0.9700    |
| 19_1_30        | 0.8500    | 1.0600    | 0.7900 | 1.0400     | 1.0900    | 2.4500    | 0.5700   | 0.4300    | 0.3100    |
| 19_1_32        | 1.6010    | 1.3650    | 1.4670 | 1.0880     | 0.6870    | 1.3620    | 0.7240   | 1.2060    | 0.7640    |
| 19_1_45        | 1.8990    | 1.1250    | 1.0420 | 1.2180     | 0.8300    | 1.2990    | 0.8610   | (outlier) | 0.8820    |
| 19_1_58        | 1.6210    | (outlier) | 1.7610 | 0.8770     | 0.8800    | 1.7030    | 0.9370   | 0.6500    | (outlier) |
| Mean           | 1.4360    | 1.0650    | 1.3280 | 1.0150     | 0.9174    | 1.7550    | 0.7844   | 0.8215    | 0.7315    |
| Std. Deviation | 0.4094    | 0.2706    | 0.4005 | 0.1528     | 0.1770    | 0.4717    | 0.1422   | 0.3476    | 0.2934    |
| <b>HDAC2</b>   | LCLC-103H | BHY       | DanG   | Pa-Tu-8902 | YAPC      | 5637      | RT-4     | RT-112    |           |

|                   |                  |              |             |                   |                |                 |                 |               |                  |
|-------------------|------------------|--------------|-------------|-------------------|----------------|-----------------|-----------------|---------------|------------------|
| 19_1_26           | 1.2700           | 1.0200       | 1.4300      | 1.1600            | 0.4200         | 0.9700          | 0.0900          | 0.4400        |                  |
| 19_1_30           | 1.5300           | 0.9300       | 1.3200      | 0.9700            | (outlier)      | 0.5600          | 0.4500          | 0.5400        |                  |
| 19_1_32           | 0.6030           | 0.8840       | 1.6430      | 1.0190            | 0.6010         | 1.4880          | 0.3040          | 0.1940        |                  |
| 19_1_45           | 1.0620           | 0.7310       | 1.0830      | 0.9310            | 0.6080         | 1.9330          | 0.3870          | 0.4960        |                  |
| 19_1_58           | 0.8410           | 0.7690       | 1.3940      | 0.9930            | 0.5450         | 1.3500          | 0.4590          | 0.3500        |                  |
| Mean              | 1.0610           | 0.8668       | 1.3740      | 1.0150            | 0.5435         | 1.2600          | 0.3380          | 0.4040        |                  |
| Std.<br>Deviation | 0.3612           | 0.1181       | 0.2022      | 0.0875            | 0.0870         | 0.5213          | 0.1519          | 0.1372        |                  |
|                   |                  |              |             |                   |                |                 |                 |               |                  |
| <b>HDAC4</b>      | <b>EFM-19</b>    | <b>MCF-7</b> | <b>MT-3</b> | <b>SiSo</b>       | <b>Kyse-70</b> | <b>Kyse-510</b> | <b>Kyse-520</b> | <b>A427</b>   | <b>EPLC-272H</b> |
| 19_1_15           | 1.4710           | 0.4620       | 0.5550      | 0.9530            | 0.8600         | 1.2820          | 0.7190          | 1.9270        | 0.2920           |
| 19_1_19           | 1.3769           | 0.3783       | 0.8203      | 1.0207            | 1.6994         | 2.0632          | 1.1484          | 1.5772        | 0.4595           |
| 19_1_26           | 1.2500           | 0.1100       | 1.2400      | 0.6800            | 2.1100         | 1.9500          | 0.9700          | 1.6100        | 0.8300           |
| 19_1_30           | 1.0494           | 0.5055       | 0.3900      | 0.6197            | 2.0948         | 1.9577          | 1.0241          | 1.4057        | 0.4340           |
| Mean              | 1.2870           | 0.3639       | 0.7513      | 0.8184            | 1.6910         | 1.8130          | 0.9654          | 1.6300        | 0.5039           |
| Std.<br>Deviation | 0.1824           | 0.1773       | 0.3709      | 0.1981            | 0.5857         | 0.3579          | 0.1804          | 0.2173        | 0.2296           |
|                   |                  |              |             |                   |                |                 |                 |               |                  |
| <b>HDAC4</b>      | <b>LCLC-103H</b> | <b>BHY</b>   | <b>DanG</b> | <b>Pa-Tu-8902</b> | <b>YAPC</b>    | <b>5637</b>     | <b>RT-4</b>     | <b>RT-112</b> |                  |
| 19_1_15           | 0.7680           | 0.2140       | 1.7750      | 1.0090            | 1.6740         | 1.0580          | 0.7760          | 1.2070        |                  |
| 19_1_19           | 0.4242           | 0.3090       | 1.4307      | (outlier)         | 2.3726         | (outlier)       | 0.5775          | 0.9938        |                  |
| 19_1_26           | 0.7400           | 0.3300       | 1.4300      | 0.9000            | 1.7500         | 0.1800          | 0.3500          | 0.5700        |                  |
| 19_1_30           | 0.5455           | 0.2474       | 1.5795      | 0.7668            | (outlier)      | 1.9391          | 0.7906          | 1.3559        |                  |
| Mean              | 0.6194           | 0.2751       | 1.5540      | 0.8919            | 1.9320         | 1.0590          | 0.6235          | 1.0320        |                  |
| Std.<br>Deviation | 0.1635           | 0.0538       | 0.1634      | 0.1213            | 0.3833         | 0.8796          | 0.2066          | 0.3418        |                  |
|                   |                  |              |             |                   |                |                 |                 |               |                  |
| <b>HDAC6</b>      | <b>EFM-19</b>    | <b>MCF-7</b> | <b>MT-3</b> | <b>SiSo</b>       | <b>Kyse-70</b> | <b>Kyse-510</b> | <b>Kyse-520</b> | <b>A427</b>   | <b>EPLC-272H</b> |
| 19_1_26           | 1.0700           | 0.1100       | 1.1500      | 1.1100            | 1.0000         | 1.0300          | 0.3900          | 2.7900        | 1.2000           |
| 19_1_30           | 1.5600           | 0.8300       | 0.2300      | 1.1700            | 0.6200         | 0.3500          | 0.0300          | 3.6400        | 0.1300           |
| 19_1_32           | 0.8500           | 0.7350       | 1.7720      | 1.4050            | 0.8340         | 1.0010          | 0.2120          | 2.5380        | 0.4930           |
| 19_1_45           | 1.7940           | 0.6040       | 1.6500      | 1.6880            | 0.7980         | 1.1120          | 0.3040          | (outlier)     | 0.3640           |
| 19_1_58           | 1.1200           | (outlier)    | 0.4380      | 3.7970            | 0.5010         | 0.3520          | 0.1960          | 4.4810        | (outlier)        |
| 19_1_72           | 1.2900           | 0.1700       | 0.3000      | 3.9800            | 0.4600         | 0.7600          | 0.0100          | 3.8200        | 0.1200           |

|                |           |        |        |            |           |           |          |           |           |
|----------------|-----------|--------|--------|------------|-----------|-----------|----------|-----------|-----------|
| Mean           | 1.2810    | 0.4898 | 0.9233 | 2.1920     | 0.7022    | 0.7675    | 0.1903   | 3.4540    | 0.4614    |
| Std. Deviation | 0.3456    | 0.3299 | 0.6935 | 1.3310     | 0.2103    | 0.3433    | 0.1493   | 0.7911    | 0.4423    |
| <b>HDAC6</b>   | LCLC-103H | BHY    | DanG   | Pa-Tu-8902 | YAPC      | 5637      | RT-4     | RT-112    |           |
| 19_1_26        | 1.2300    | 0.8900 | 0.2700 | 0.6600     | 1.9600    | 0.4200    | 0.5800   | 1.1600    |           |
| 19_1_30        | 0.6200    | 0.3400 | 0.1100 | 0.3900     | (outlier) | 4.1500    | 0.8600   | 1.8900    |           |
| 19_1_32        | 1.0080    | 0.9380 | 0.2440 | 0.1060     | 3.1210    | 0.1720    | 0.7230   | 0.8460    |           |
| 19_1_45        | 1.0700    | 1.0460 | 0.1340 | 0.6580     | 1.5870    | 1.5620    | 0.9190   | 1.5370    |           |
| 19_1_58        | 1.0560    | 0.6370 | 0.1730 | 0.4740     | 1.9300    | 0.5390    | 0.2080   | 0.7560    |           |
| 19_1_72        | 0.3000    | 0.5600 | 0.0100 | (outlier)  | 4.1500    | (outlier) | 0.0000   | 1.0600    |           |
| Mean           | 0.8807    | 0.7352 | 0.1568 | 0.4576     | 2.5500    | 1.3690    | 0.5483   | 1.2080    |           |
| Std. Deviation | 0.3493    | 0.2677 | 0.0948 | 0.2289     | 1.0660    | 1.6430    | 0.3695   | 0.4320    |           |
|                |           |        |        |            |           |           |          |           |           |
| <b>Sirt1</b>   | EFM-19    | MCF-7  | MT-3   | SiSo       | Kyse-70   | Kyse-510  | Kyse-520 | A427      | EPLC-272H |
| 19_1_15        | 0.4120    | 1.6240 | 0.9320 | 1.6920     | 1.2130    | 0.6530    | 0.5790   | 4.5220    | 0.3390    |
| 19_1_19        | 0.3902    | 0.7098 | 1.1877 | 1.1766     | 1.0739    | 0.6264    | 0.6444   | 5.8579    | 1.2907    |
| 19_1_26        | 0.4200    | 0.4600 | 1.5700 | 1.1300     | 1.5500    | 1.0100    | 0.7600   | 4.2300    | 1.2900    |
| 19_1_30        | 0.4400    | 1.4100 | 0.5200 | 0.9000     | 1.4400    | 1.0100    | 0.9100   | 3.9200    | 1.1800    |
| 19_1_32        | 0.3180    | 0.8890 | 1.0630 | 1.0220     | 1.3400    | 0.9460    | 1.0210   | 2.6500    | 1.4330    |
| 19_1_45        | 0.4490    | 1.0030 | 1.3830 | 1.2130     | 1.1640    | 0.7020    | 0.7960   | (outlier) | 1.3010    |
| Mean           | 0.4049    | 1.0160 | 1.1090 | 1.1890     | 1.2970    | 0.8246    | 0.7851   | 4.2360    | 1.1390    |
| Std. Deviation | 0.0474    | 0.4345 | 0.3672 | 0.2715     | 0.1793    | 0.1829    | 0.1639   | 1.1540    | 0.4000    |
| <b>Sirt1</b>   | LCLC-103H | BHY    | DanG   | Pa-Tu-8902 | YAPC      | 5637      | RT-4     | RT-112    |           |
| 19_1_15        | 1.1230    | 0.6940 | 0.4240 | 1.5420     | 0.5470    | 0.4480    | 0.1520   | 0.1070    |           |
| 19_1_19        | 1.0535    | 0.8406 | 0.3642 | (outlier)  | 0.9501    | (outlier) | 0.2156   | 0.2864    |           |
| 19_1_26        | 1.0200    | 0.6900 | 0.3500 | 1.0600     | 0.6800    | 0.4100    | 0.1400   | 0.2400    |           |
| 19_1_30        | 1.0900    | 0.9500 | 0.4700 | 1.1000     | (outlier) | 0.8400    | 0.0100   | 0.3000    |           |
| 19_1_32        | 1.2450    | 1.2300 | 0.6210 | 0.7600     | 1.1210    | 0.5170    | 0.3880   | 0.4360    |           |
| 19_1_45        | 1.4160    | 1.0050 | 0.7110 | 1.4170     | 1.1540    | 1.0510    | 0.4110   | 0.3920    |           |
| Mean           | 1.1580    | 0.9016 | 0.4900 | 1.1760     | 0.8904    | 0.6532    | 0.2194   | 0.2936    |           |
| Std. Deviation | 0.1483    | 0.2061 | 0.1457 | 0.3100     | 0.2685    | 0.2797    | 0.1548   | 0.1164    |           |

|                |           |        |        |            |           |           |          |        |           |
|----------------|-----------|--------|--------|------------|-----------|-----------|----------|--------|-----------|
|                |           |        |        |            |           |           |          |        |           |
| <b>Sirt2</b>   | EFM-19    | MCF-7  | MT-3   | SiSo       | Kyse-70   | Kyse-510  | Kyse-520 | A427   | EPLC-272H |
| 19_1_15        | 2.2040    | 1.5450 | 0.7370 | 1.1980     | 0.4020    | 0.3710    | 0.4310   | 0.5970 | 0.5390    |
| 19_1_19        | 2.3136    | 1.3385 | 0.7097 | 1.1276     | 0.7356    | 0.5985    | 0.6322   | 0.6294 | 0.6601    |
| 19_1_26        | 1.9500    | 1.2800 | 0.5800 | 1.0000     | 0.5600    | 0.2200    | 0.4100   | 0.6700 | 0.8100    |
| 19_1_30        | 1.6800    | 1.3100 | 0.7400 | 1.0000     | 0.5600    | 0.2200    | 0.6200   | 0.6200 | 0.6300    |
| Mean           | 2.0370    | 1.3680 | 0.6917 | 1.0810     | 0.5644    | 0.3524    | 0.5233   | 0.6291 | 0.6598    |
| Std. Deviation | 0.2825    | 0.1202 | 0.0757 | 0.0983     | 0.1363    | 0.1789    | 0.1191   | 0.0305 | 0.1126    |
| <b>Sirt2</b>   | LCLC-103H | BHY    | DanG   | Pa-Tu-8902 | YAPC      | 5637      | RT-4     | RT-112 |           |
| 19_1_15        | 0.8520    | 0.6610 | 1.0370 | 0.2600     | 1.2110    | 1.3990    | 2.2160   | 1.3400 |           |
| 19_1_19        | 0.4892    | 0.8161 | 1.0412 | (outlier)  | 1.5604    | (outlier) | 2.0139   | 1.5539 |           |
| 19_1_26        | 0.8000    | 0.9100 | 0.8800 | 0.3200     | 1.2100    | 1.1600    | 2.8300   | 1.4300 |           |
| 19_1_30        | 0.7600    | 0.6800 | 1.0800 | 0.2500     | (outlier) | 1.4200    | 2.8300   | 1.4600 |           |
| Mean           | 0.7253    | 0.7668 | 1.0100 | 0.2767     | 1.3270    | 1.3260    | 2.4720   | 1.4460 |           |
| Std. Deviation | 0.1618    | 0.1178 | 0.0885 | 0.0379     | 0.2020    | 0.1444    | 0.4210   | 0.0882 |           |
|                |           |        |        |            |           |           |          |        |           |
| <b>Sirt3</b>   | EFM-19    | MCF-7  | MT-3   | SiSo       | Kyse-70   | Kyse-510  | Kyse-520 | A427   | EPLC-272H |
| 19_1_15        | 0.4510    | 1.2340 | 2.1540 | 0.7810     | 1.7850    | 1.0310    | 0.6790   | 2.7330 | 0.5960    |
| 19_1_19        | 0.3494    | 1.2609 | 2.3490 | 0.8142     | 2.3233    | 1.1651    | 0.4160   | 3.6066 | 0.4640    |
| 19_1_26        | 0.1900    | 0.8300 | 2.6700 | 0.4400     | 2.3000    | 0.8100    | 0.5100   | 4.0000 | 0.8900    |
| 19_1_30        | 0.2800    | 1.4900 | 2.4500 | 0.4800     | 2.4000    | 0.6500    | 0.4800   | 3.6500 | 0.6300    |
| Mean           | 0.3176    | 1.2040 | 2.4060 | 0.6288     | 2.2020    | 0.9140    | 0.5212   | 3.4970 | 0.6450    |
| Std. Deviation | 0.1103    | 0.2744 | 0.2148 | 0.1961     | 0.2813    | 0.2289    | 0.1123   | 0.5392 | 0.1783    |
| <b>Sirt3</b>   | LCLC-103H | BHY    | DanG   | Pa-Tu-8902 | YAPC      | 5637      | RT-4     | RT-112 |           |
| 19_1_15        | 1.1450    | 1.0630 | 0.8270 | 0.5850     | 0.5420    | 0.3500    | 0.6780   | 0.3670 |           |
| 19_1_19        | 0.8486    | 1.2747 | 0.5198 | (outlier)  | 0.8610    | (outlier) | 0.3953   | 0.2197 |           |
| 19_1_26        | 0.9400    | 1.2000 | 0.6700 | 0.4800     | 0.5200    | 0.1300    | 0.3100   | 0.1100 |           |
| 19_1_30        | 0.9700    | 0.8800 | 0.8800 | 0.4400     | (outlier) | 0.6100    | 0.4100   | 0.1500 |           |
| Mean           | 0.9759    | 1.1040 | 0.7242 | 0.5017     | 0.6410    | 0.3633    | 0.4483   | 0.2117 |           |

|                |           |           |        |            |           |          |          |           |           |
|----------------|-----------|-----------|--------|------------|-----------|----------|----------|-----------|-----------|
| Std. Deviation | 0.1240    | 0.1734    | 0.1628 | 0.0749     | 0.1908    | 0.2403   | 0.1593   | 0.1130    |           |
|                |           |           |        |            |           |          |          |           |           |
| <b>Sirt5</b>   | EFM-19    | MCF-7     | MT-3   | SiSo       | Kyse-70   | Kyse-510 | Kyse-520 | A427      | EPLC-272H |
| 19_1_26        | 0.4200    | 0.8000    | 0.8300 | 0.3900     | 1.2900    | 1.3000   | 0.6400   | 1.1900    | 1.4000    |
| 19_1_30        | 0.3633    | 1.0639    | 1.4179 | 0.8495     | 1.4616    | 1.0524   | 0.5443   | 1.1173    | 0.8794    |
| 19_1_32        | 0.3380    | 0.8150    | 1.1070 | 0.5470     | 1.5360    | 1.8940   | 0.4940   | 0.8590    | 0.7400    |
| 19_1_45        | 0.4940    | 0.7060    | 0.9230 | 0.5960     | 1.0890    | 1.4650   | 0.9230   | (outlier) | 0.8200    |
| 19_1_58        | 0.3910    | (outlier) | 0.7220 | 0.2560     | 1.1170    | 1.9540   | 0.7260   | 0.7550    | (outlier) |
| Mean           | 0.4013    | 0.8462    | 1.0000 | 0.5277     | 1.2990    | 1.5330   | 0.6655   | 0.9803    | 0.9598    |
| Std. Deviation | 0.0602    | 0.1529    | 0.2731 | 0.2244     | 0.1999    | 0.3865   | 0.1694   | 0.2067    | 0.2989    |
| <b>Sirt5</b>   | LCLC-103H | BHY       | DanG   | Pa-Tu-8902 | YAPC      | 5637     | RT-4     | RT-112    |           |
| 19_1_26        | 0.6000    | 1.3200    | 2.5700 | 1.5100     | 0.8500    | 0.2400   | 0.8000   | 0.8600    |           |
| 19_1_30        | 0.1699    | 0.7653    | 3.9278 | 0.8666     | (outlier) | 1.2612   | 0.7343   | 0.3736    |           |
| 19_1_32        | 0.5660    | 1.1120    | 3.0010 | 1.0620     | 1.1380    | 0.1000   | 0.6930   | 0.9990    |           |
| 19_1_45        | 0.4840    | 0.9950    | 3.4530 | 1.6050     | 1.0550    | 0.2210   | 0.7560   | 0.8220    |           |
| 19_1_58        | 0.3390    | 0.9430    | 3.0780 | 1.3600     | 1.0840    | 0.0600   | 0.7200   | 0.6180    |           |
| Mean           | 0.4318    | 1.0270    | 3.2060 | 1.2810     | 1.0320    | 0.3764   | 0.7407   | 0.7345    |           |
| Std. Deviation | 0.1776    | 0.2059    | 0.5111 | 0.3096     | 0.1260    | 0.5005   | 0.0403   | 0.2435    |           |
|                |           |           |        |            |           |          |          |           |           |
| <b>Sirt6</b>   | EFM-19    | MCF-7     | MT-3   | SiSo       | Kyse-70   | Kyse-510 | Kyse-520 | A427      | EPLC-272H |
| 19_1_32        | 0.7760    | 1.1420    | 1.4870 | 0.7000     | 2.2410    | 0.7930   | 1.0940   | 2.1080    | 1.4580    |
| 19_1_45        | 0.4640    | 0.8140    | 1.2050 | 0.7320     | 2.3420    | 0.8330   | 0.8550   | (outlier) | 1.9230    |
| 19_1_58        | 0.8490    | (outlier) | 1.9420 | 0.5920     | 1.7530    | 0.7430   | 0.7240   | 1.9720    | (outlier) |
| 19_1_72        | 0.7200    | 0.7600    | 2.2200 | 0.6900     | 2.3000    | 0.5700   | 0.8300   | 3.1100    | 1.6100    |
| 19_1_82        | 0.8380    | (outlier) | 1.5191 | (outlier)  | 1.6232    | 0.8631   | 0.8990   | 2.0122    | 1.0736    |
| Mean           | 0.7294    | 0.9053    | 1.6750 | 0.6785     | 2.0520    | 0.7604   | 0.8804   | 2.3010    | 1.5160    |
| Std. Deviation | 0.1572    | 0.2067    | 0.4028 | 0.0604     | 0.3371    | 0.1156   | 0.1357   | 0.5426    | 0.3529    |
| <b>Sirt6</b>   | LCLC-103H | BHY       | DanG   | Pa-Tu-8902 | YAPC      | 5637     | RT-4     | RT-112    |           |
| 19_1_32        | 1.1520    | 0.6430    | 0.4390 | 0.2120     | 0.3900    | 1.0670   | 0.5740   | 0.7260    |           |

|                   |           |           |        |            |           |           |          |           |           |
|-------------------|-----------|-----------|--------|------------|-----------|-----------|----------|-----------|-----------|
| 19_1_45           | 1.2960    | 0.7280    | 0.5580 | 0.2850     | 0.4490    | 1.8270    | 0.6600   | 0.7480    |           |
| 19_1_58           | 1.0760    | 0.6180    | 0.5230 | 0.2100     | 0.6340    | 2.4640    | 1.1580   | 0.6000    |           |
| 19_1_72           | 1.3000    | 0.5800    | 0.3400 | (outlier)  | 0.3600    | (outlier) | 0.7900   | 0.6800    |           |
| 19_1_82           | 1.3071    | 0.7015    | 0.8264 | 0.5547     | 0.5203    | 1.5664    | 0.6416   | 0.8422    |           |
| Mean              | 1.2260    | 0.6541    | 0.5373 | 0.3154     | 0.4707    | 1.7310    | 0.7647   | 0.7192    |           |
| Std.<br>Deviation | 0.1060    | 0.0605    | 0.1822 | 0.1633     | 0.1100    | 0.5815    | 0.2333   | 0.0891    |           |
|                   |           |           |        |            |           |           |          |           |           |
| <b>Sirt7</b>      | EFM-19    | MCF-7     | MT-3   | SiSo       | Kyse-70   | Kyse-510  | Kyse-520 | A427      | EPLC-272H |
| 19_1_30           | 0.6800    | 1.6800    | 0.4900 | 0.6700     | 0.3800    | 1.4100    | 1.2200   | 2.0900    | 0.8400    |
| 19_1_32           | 0.4450    | 1.5310    | 1.1300 | 0.9530     | 0.4550    | 1.2640    | 1.2890   | 1.8840    | 1.1710    |
| 19_1_45           | 0.5420    | 1.6400    | 1.1230 | 0.9550     | 0.4790    | 1.2480    | 1.1500   | (outlier) | 0.9690    |
| 19_1_58           | 0.8260    | (outlier) | 1.7810 | 1.0290     | 0.7030    | 0.8000    | 0.8850   | 1.3670    | (outlier) |
| 19_1_72           | 0.8900    | 1.6000    | 1.7400 | 1.1700     | 0.7200    | 1.0600    | 0.9900   | 1.8500    | 0.8600    |
| 19_1_82           | 0.7290    | (outlier) | 1.4020 | (outlier)  | 0.5380    | 1.5260    | 0.9850   | 1.3330    | 0.7610    |
| Mean              | 0.6853    | 1.6130    | 1.2780 | 0.9554     | 0.5458    | 1.2180    | 1.0870   | 1.7050    | 0.9202    |
| Std.<br>Deviation | 0.1685    | 0.0635    | 0.4793 | 0.1823     | 0.1381    | 0.2586    | 0.1569   | 0.3369    | 0.1587    |
| <b>Sirt7</b>      | LCLC-103H | BHY       | DanG   | Pa-Tu-8902 | YAPC      | 5637      | RT-4     | RT-112    |           |
| 19_1_30           | 1.5700    | 1.2200    | 0.6800 | 1.5100     | (outlier) | 0.9100    | 0.7200   | 0.5300    |           |
| 19_1_32           | 1.4070    | 1.2940    | 0.7820 | 0,651      | 1.0300    | 0.4980    | 0.5250   | 0.6890    |           |
| 19_1_45           | 1.6870    | 1.0910    | 0.7600 | 1.6890     | 0,813     | 1.1410    | 0.5880   | 0.5840    |           |
| 19_1_58           | 1.3310    | 1.1720    | 0.7750 | 1.5100     | 1.0840    | 1.2940    | 0.9960   | 0.5910    |           |
| 19_1_72           | 1.3000    | 1.2200    | 0.7200 | (outlier)  | 1.0400    | (outlier) | 0.7100   | 0.8500    |           |
| 19_1_82           | 1.7020    | 1.1110    | 0.5560 | 1.8060     | 1.0210    | 0.6810    | 0.5580   | 0.7500    |           |
| Mean              | 1.5000    | 1.1850    | 0.7122 | 1.6290     | 1.0440    | 0.9048    | 0.6828   | 0.6657    |           |
| Std.<br>Deviation | 0.1777    | 0.0759    | 0.0856 | 0.1452     | 0.0279    | 0.3251    | 0.1730   | 0.1202    |           |



**Table S2.** R and p-values of Pearson correlation matrix for HDAC isoenzyme protein expression.

|           | HDAC1  |       | HDAC2  |       | HDAC4  |       | HDAC6  |       |
|-----------|--------|-------|--------|-------|--------|-------|--------|-------|
| Isoenzyme | R      | p     | R      | p     | R      | p     | R      | p     |
| HDAC1     | 1.000  | 0.000 | 0.209  | 0.473 | 0.032  | 0.913 | 0.226  | 0.438 |
| HDAC2     | 0.209  | 0.473 | 1.000  | 0.000 | 0.166  | 0.570 | -0.229 | 0.430 |
| HDAC4     | 0.032  | 0.913 | 0.166  | 0.570 | 1.000  | 0.000 | 0.374  | 0.188 |
| HDAC6     | 0.226  | 0.438 | -0.229 | 0.430 | 0.374  | 0.188 | 1.000  | 0.000 |
| Sirt1     | 0.627  | 0.016 | 0.024  | 0.936 | 0.265  | 0.361 | 0.708  | 0.005 |
| Sirt2     | -0.526 | 0.053 | -0.588 | 0.027 | -0.300 | 0.298 | -0.032 | 0.915 |
| Sirt3     | 0.643  | 0.013 | 0.155  | 0.596 | 0.206  | 0.479 | 0.410  | 0.146 |
| Sirt5     | 0.181  | 0.536 | 0.389  | 0.169 | 0.455  | 0.102 | -0.282 | 0.328 |
| Sirt6     | 0.228  | 0.434 | 0.139  | 0.634 | 0.172  | 0.557 | 0.323  | 0.260 |
| Sirt7     | 0.730  | 0.003 | 0.274  | 0.343 | -0.236 | 0.417 | 0.303  | 0.292 |
|           |        |       |        |       |        |       |        |       |
|           | Sirt1  |       | Sirt2  |       | Sirt3  |       | Sirt5  |       |
| Isoenzyme | R      | p     | R      | p     | R      | p     | R      | p     |
| HDAC1     | 0.627  | 0.016 | -0.526 | 0.053 | 0.643  | 0.013 | 0.181  | 0.536 |
| HDAC2     | 0.024  | 0.936 | -0.588 | 0.027 | 0.155  | 0.596 | 0.389  | 0.169 |
| HDAC4     | 0.265  | 0.361 | -0.300 | 0.298 | 0.206  | 0.479 | 0.455  | 0.102 |
| HDAC6     | 0.708  | 0.005 | -0.032 | 0.915 | 0.410  | 0.146 | -0.282 | 0.328 |
| Sirt1     | 1.000  | 0.000 | -0.404 | 0.152 | 0.840  | 0.000 | -0.083 | 0.778 |
| Sirt2     | -0.404 | 0.152 | 1.000  | 0.000 | -0.465 | 0.094 | -0.186 | 0.525 |
| Sirt3     | 0.840  | 0.000 | -0.465 | 0.094 | 1.000  | 0.000 | 0.077  | 0.793 |
| Sirt5     | -0.083 | 0.778 | -0.186 | 0.525 | 0.077  | 0.793 | 1.000  | 0.000 |
| Sirt6     | 0.665  | 0.009 | -0.333 | 0.245 | 0.774  | 0.001 | -0.213 | 0.464 |
| Sirt7     | 0.605  | 0.022 | -0.371 | 0.192 | 0.482  | 0.081 | -0.255 | 0.379 |
|           |        |       |        |       |        |       |        |       |
|           | Sirt6  |       | Sirt7  |       |        |       |        |       |
| Isoenzyme | R      | p     | R      | p     |        |       |        |       |
| HDAC1     | 0.228  | 0.434 | 0.730  | 0.003 |        |       |        |       |
| HDAC2     | 0.139  | 0.634 | 0.274  | 0.343 |        |       |        |       |
| HDAC4     | 0.172  | 0.557 | -0.236 | 0.417 |        |       |        |       |
| HDAC6     | 0.323  | 0.260 | 0.303  | 0.292 |        |       |        |       |
| Sirt1     | 0.665  | 0.009 | 0.605  | 0.022 |        |       |        |       |

|              |        |       |        |       |  |  |  |  |
|--------------|--------|-------|--------|-------|--|--|--|--|
| <b>Sirt2</b> | -0.333 | 0.245 | -0.371 | 0.192 |  |  |  |  |
| <b>Sirt3</b> | 0.774  | 0.001 | 0.482  | 0.081 |  |  |  |  |
| <b>Sirt5</b> | -0.213 | 0.464 | -0.255 | 0.379 |  |  |  |  |
| <b>Sirt6</b> | 1.000  | 0.000 | 0.248  | 0.393 |  |  |  |  |
| <b>Sirt7</b> | 0.248  | 0.393 | 1.000  | 0.000 |  |  |  |  |

**Table S3.** R and p-values of Spearman correlation matrix for HDAC isoenzyme protein expression.

|           | HDAC1  |       | HDAC2  |       | HDAC4  |       | HDAC6  |       |
|-----------|--------|-------|--------|-------|--------|-------|--------|-------|
| Isoenzyme | R      | p     | R      | p     | R      | p     | R      | p     |
| HDAC1     | 1.000  | 0.000 | 0.191  | 0.513 | 0.064  | 0.829 | 0.033  | 0.911 |
| HDAC2     | 0.191  | 0.513 | 1.000  | 0.000 | 0.059  | 0.840 | -0.165 | 0.573 |
| HDAC4     | 0.064  | 0.829 | 0.059  | 0.840 | 1.000  | 0.000 | 0.314  | 0.274 |
| HDAC6     | 0.033  | 0.911 | -0.165 | 0.573 | 0.314  | 0.274 | 1.000  | 0.000 |
| Sirt1     | 0.455  | 0.102 | 0.174  | 0.553 | 0.002  | 0.994 | 0.371  | 0.191 |
| Sirt2     | -0.446 | 0.110 | -0.393 | 0.164 | -0.301 | 0.296 | 0.090  | 0.759 |
| Sirt3     | 0.719  | 0.004 | 0.341  | 0.233 | -0.051 | 0.864 | 0.015  | 0.958 |
| Sirt5     | 0.525  | 0.054 | 0.248  | 0.392 | 0.446  | 0.110 | -0.266 | 0.358 |
| Sirt6     | -0.007 | 0.982 | 0.130  | 0.659 | -0.015 | 0.958 | 0.125  | 0.670 |
| Sirt7     | 0.710  | 0.004 | 0.301  | 0.296 | -0.275 | 0.342 | 0.182  | 0.533 |
|           |        |       |        |       |        |       |        |       |
|           | Sirt1  |       | Sirt2  |       | Sirt3  |       | Sirt5  |       |
| Isoenzyme | R      | p     | R      | p     | R      | p     | R      | p     |
| HDAC1     | 0.455  | 0.102 | -0.446 | 0.110 | 0.719  | 0.004 | 0.525  | 0.054 |
| HDAC2     | 0.174  | 0.553 | -0.393 | 0.164 | 0.341  | 0.233 | 0.248  | 0.392 |
| HDAC4     | 0.002  | 0.994 | -0.301 | 0.296 | -0.051 | 0.864 | 0.446  | 0.110 |
| HDAC6     | 0.371  | 0.191 | 0.090  | 0.759 | 0.015  | 0.958 | -0.266 | 0.358 |
| Sirt1     | 1.000  | 0.000 | -0.473 | 0.088 | 0.776  | 0.001 | 0.037  | 0.899 |
| Sirt2     | -0.473 | 0.088 | 1.000  | 0.000 | -0.512 | 0.061 | -0.301 | 0.296 |
| Sirt3     | 0.776  | 0.001 | -0.512 | 0.061 | 1.000  | 0.000 | 0.459  | 0.098 |
| Sirt5     | 0.037  | 0.899 | -0.301 | 0.296 | 0.459  | 0.098 | 1.000  | 0.000 |
| Sirt6     | 0.459  | 0.098 | -0.354 | 0.215 | 0.424  | 0.131 | -0.297 | 0.303 |
| Sirt7     | 0.495  | 0.072 | -0.332 | 0.246 | 0.604  | 0.022 | -0.059 | 0.840 |
|           |        |       |        |       |        |       |        |       |
|           | Sirt6  |       | Sirt7  |       |        |       |        |       |
| Isoenzyme | R      | p     | R      | p     |        |       |        |       |
| HDAC1     | -0.007 | 0.982 | 0.710  | 0.004 |        |       |        |       |
| HDAC2     | 0.130  | 0.659 | 0.301  | 0.296 |        |       |        |       |
| HDAC4     | -0.015 | 0.958 | -0.275 | 0.342 |        |       |        |       |
| HDAC6     | 0.125  | 0.670 | 0.182  | 0.533 |        |       |        |       |
| Sirt1     | 0.459  | 0.098 | 0.495  | 0.072 |        |       |        |       |

|              |        |       |        |       |  |  |  |  |
|--------------|--------|-------|--------|-------|--|--|--|--|
| <b>Sirt2</b> | -0.354 | 0.215 | -0.332 | 0.246 |  |  |  |  |
| <b>Sirt3</b> | 0.424  | 0.131 | 0.604  | 0.022 |  |  |  |  |
| <b>Sirt5</b> | -0.297 | 0.303 | -0.059 | 0.840 |  |  |  |  |
| <b>Sirt6</b> | 1.000  | 0.000 | 0.266  | 0.358 |  |  |  |  |
| <b>Sirt7</b> | 0.266  | 0.358 | 1.000  | 0.000 |  |  |  |  |

**Table S4.** R and p-values of Pearson correlation matrix for HDAC isoenzyme mRNA expression with data of the NCI 60 cancer cell line program.

|           | HDAC1  |       | HDAC2  |       | HDAC4  |       | HDAC6  |       |
|-----------|--------|-------|--------|-------|--------|-------|--------|-------|
| Isoenzyme | R      | p     | R      | p     | R      | p     | R      | p     |
| HDAC1     | 1.000  | 0.000 | 0.354  | 0.006 | 0.192  | 0.145 | 0.364  | 0.005 |
| HDAC2     | 0.354  | 0.006 | 1.000  | 0.000 | 0.197  | 0.135 | 0.139  | 0.290 |
| HDAC4     | 0.192  | 0.145 | 0.197  | 0.135 | 1.000  | 0.000 | 0.258  | 0.049 |
| HDAC6     | 0.364  | 0.005 | 0.139  | 0.290 | 0.258  | 0.049 | 1.000  | 0.000 |
| Sirt1     | 0.269  | 0.039 | 0.269  | 0.038 | 0.076  | 0.566 | 0.316  | 0.014 |
| Sirt2     | -0.165 | 0.211 | -0.242 | 0.063 | -0.079 | 0.552 | -0.050 | 0.706 |
| Sirt3     | 0.083  | 0.531 | 0.102  | 0.438 | 0.150  | 0.255 | 0.036  | 0.782 |
| Sirt5     | -0.138 | 0.296 | -0.115 | 0.382 | 0.003  | 0.983 | 0.032  | 0.810 |
| Sirt6     | 0.182  | 0.168 | -0.078 | 0.552 | -0.061 | 0.645 | -0.033 | 0.802 |
| Sirt7     | 0.069  | 0.605 | -0.043 | 0.743 | 0.037  | 0.783 | 0.028  | 0.830 |
|           |        |       |        |       |        |       |        |       |
|           | Sirt1  |       | Sirt2  |       | Sirt3  |       | Sirt5  |       |
| Isoenzyme | R      | p     | R      | p     | R      | p     | R      | p     |
| HDAC1     | 0.269  | 0.039 | -0.165 | 0.211 | 0.083  | 0.531 | -0.138 | 0.296 |
| HDAC2     | 0.269  | 0.038 | -0.242 | 0.063 | 0.102  | 0.438 | -0.115 | 0.382 |
| HDAC4     | 0.076  | 0.566 | -0.079 | 0.552 | 0.150  | 0.255 | 0.003  | 0.983 |
| HDAC6     | 0.316  | 0.014 | -0.050 | 0.706 | 0.036  | 0.782 | 0.032  | 0.810 |
| Sirt1     | 1.000  | 0.000 | -0.016 | 0.905 | 0.197  | 0.132 | 0.055  | 0.675 |
| Sirt2     | -0.016 | 0.905 | 1.000  | 0.000 | 0.080  | 0.541 | 0.252  | 0.053 |
| Sirt3     | 0.197  | 0.132 | 0.080  | 0.541 | 1.000  | 0.000 | -0.024 | 0.854 |
| Sirt5     | 0.055  | 0.675 | 0.252  | 0.053 | -0.024 | 0.854 | 1.000  | 0.000 |
| Sirt6     | -0.001 | 0.992 | 0.005  | 0.971 | -0.103 | 0.434 | 0.174  | 0.184 |
| Sirt7     | 0.079  | 0.551 | -0.025 | 0.851 | 0.142  | 0.278 | -0.057 | 0.666 |
|           |        |       |        |       |        |       |        |       |
|           | Sirt6  |       | Sirt7  |       |        |       |        |       |
| Isoenzyme | R      | p     | R      | p     |        |       |        |       |
| HDAC1     | 0.182  | 0.168 | 0.069  |       |        |       |        |       |
| HDAC2     | -0.078 | 0.552 | -0.043 |       |        |       |        |       |
| HDAC4     | -0.061 | 0.645 | 0.037  |       |        |       |        |       |
| HDAC6     | -0.033 | 0.802 | 0.028  |       |        |       |        |       |
| Sirt1     | -0.001 | 0.992 | 0.079  |       |        |       |        |       |

|              |        |       |        |  |  |  |  |  |
|--------------|--------|-------|--------|--|--|--|--|--|
| <b>Sirt2</b> | 0.005  | 0.971 | -0.025 |  |  |  |  |  |
| <b>Sirt3</b> | -0.103 | 0.434 | 0.142  |  |  |  |  |  |
| <b>Sirt5</b> | 0.174  | 0.184 | -0.057 |  |  |  |  |  |
| <b>Sirt6</b> | 1.000  | 0.000 | 0.089  |  |  |  |  |  |
| <b>Sirt7</b> | 0.089  | 0.497 | 1.000  |  |  |  |  |  |

**Table S5.** Doubling times in hours of cancer cell lines [mean  $\pm$  SD of n=5 independent determinations].

|                   | <b>doubling time [h]</b> |
|-------------------|--------------------------|
| <b>EFM-19</b>     | 90.1 $\pm$ 66.1          |
| <b>MCF-7</b>      | 50.5 $\pm$ 6.7           |
| <b>MT-3</b>       | 44.8 $\pm$ 14.3          |
| <b>SiSo</b>       | 24.2 $\pm$ 0.9           |
| <b>Kyse-70</b>    | 26.4 $\pm$ 1.5           |
| <b>Kyse-510</b>   | 21.8 $\pm$ 3.2           |
| <b>Kyse-520</b>   | 29.8 $\pm$ 5.8           |
| <b>A427</b>       | 28.0 $\pm$ 1.9           |
| <b>EPLC-272H</b>  | 100.9 $\pm$ 13.8         |
| <b>LCLC-103H</b>  | 22.1 $\pm$ 2.2           |
| <b>BHY</b>        | 28.6 $\pm$ 2.7           |
| <b>DanG</b>       | 29.7 $\pm$ 3.0           |
| <b>Pa-Tu-8902</b> | 22.3 $\pm$ 1.6           |
| <b>YAPC</b>       | 42.9 $\pm$ 3.0           |
| <b>5637</b>       | 21.5 $\pm$ 1.2           |
| <b>RT-4</b>       | 45.4 $\pm$ 7.0           |
| <b>RT-112</b>     | 26.8 $\pm$ 2.9           |

**Table S6.** R and p-values of univariate correlation of HDAC isoenzyme protein expression with anticancer drug potency expressed as GI<sub>50</sub> values and the doubling time of cancer cells.

|           | Azacitidine |       | Bortezomib |       | Busulfan |       | Camptothecin |       |
|-----------|-------------|-------|------------|-------|----------|-------|--------------|-------|
| Isoenzyme | R           | p     | R          | p     | R        | p     | R            | p     |
| HDAC1     | 0.141       | 0.661 | -0.524     | 0.183 | -0.455   | 0.137 | -0.025       | 0.939 |
| HDAC2     | -0.078      | 0.809 | 0.240      | 0.567 | -0.486   | 0.109 | 0.377        | 0.227 |
| HDAC4     | -0.431      | 0.161 | 0.704      | 0.051 | -0.400   | 0.198 | 0.311        | 0.325 |
| HDAC6     | -0.179      | 0.577 | 0.246      | 0.557 | -0.287   | 0.367 | -0.438       | 0.154 |
| Sirt1     | -0.342      | 0.277 | 0.116      | 0.785 | -0.299   | 0.345 | -0.272       | 0.393 |
| Sirt2     | 0.337       | 0.284 | -0.444     | 0.270 | 0.683    | 0.014 | -0.287       | 0.367 |
| Sirt3     | -0.315      | 0.319 | -0.129     | 0.760 | -0.256   | 0.422 | -0.262       | 0.411 |
| Sirt5     | -0.229      | 0.473 | -0.173     | 0.682 | -0.203   | 0.526 | 0.466        | 0.127 |
| Sirt6     | -0.475      | 0.118 | 0.293      | 0.481 | -0.205   | 0.523 | -0.426       | 0.168 |
| Sirt7     | 0.246       | 0.441 | -0.226     | 0.590 | -0.228   | 0.475 | -0.092       | 0.775 |

|           | Carboplatin |       | Chlorambucil |       | Cisplatin |       | Colchicine |       |
|-----------|-------------|-------|--------------|-------|-----------|-------|------------|-------|
| Isoenzyme | R           | p     | R            | p     | R         | p     | R          | p     |
| HDAC1     | 0.317       | 0.315 | -0.132       | 0.683 | 0.273     | 0.391 | 0.087      | 0.789 |
| HDAC2     | -0.601      | 0.039 | -0.175       | 0.587 | -0.543    | 0.068 | -0.136     | 0.673 |
| HDAC4     | 0.177       | 0.583 | 0.249        | 0.436 | 0.180     | 0.577 | -0.090     | 0.780 |
| HDAC6     | 0.170       | 0.598 | -0.560       | 0.058 | 0.204     | 0.525 | -0.277     | 0.384 |
| Sirt1     | 0.075       | 0.816 | -0.419       | 0.175 | 0.092     | 0.777 | -0.170     | 0.598 |
| Sirt2     | 0.205       | 0.523 | -0.080       | 0.805 | 0.058     | 0.857 | 0.028      | 0.930 |
| Sirt3     | 0.103       | 0.750 | -0.216       | 0.499 | -0.012    | 0.969 | 0.083      | 0.797 |
| Sirt5     | -0.068      | 0.834 | 0.274        | 0.389 | -0.134    | 0.677 | 0.049      | 0.881 |
| Sirt6     | -0.139      | 0.667 | -0.327       | 0.299 | -0.210    | 0.512 | 0.076      | 0.815 |
| Sirt7     | 0.082       | 0.801 | -0.430       | 0.163 | 0.146     | 0.651 | -0.209     | 0.514 |

|           | Doxorubicin |       | Etoposide |       | 5-Fluorouracil |       | Hydroxyurea |       |
|-----------|-------------|-------|-----------|-------|----------------|-------|-------------|-------|
| Isoenzyme | R           | p     | R         | p     | R              | p     | R           | p     |
| HDAC1     | -0.084      | 0.795 | -0.455    | 0.137 | -0.186         | 0.562 | -0.082      | 0.799 |
| HDAC2     | -0.194      | 0.546 | -0.469    | 0.124 | -0.366         | 0.241 | -0.515      | 0.086 |
| HDAC4     | 0.196       | 0.542 | -0.312    | 0.324 | -0.438         | 0.155 | 0.022       | 0.947 |
| HDAC6     | -0.425      | 0.169 | -0.204    | 0.524 | -0.056         | 0.863 | 0.266       | 0.403 |
| Sirt1     | -0.298      | 0.347 | -0.269    | 0.397 | -0.234         | 0.464 | 0.066       | 0.839 |



|              |        |       |        |       |        |       |        |       |
|--------------|--------|-------|--------|-------|--------|-------|--------|-------|
| <b>Sirt2</b> | -0.034 | 0.916 | 0.761  | 0.004 | 0.249  | 0.435 | 0.628  | 0.029 |
| <b>Sirt3</b> | -0.030 | 0.927 | -0.198 | 0.537 | -0.465 | 0.128 | 0.047  | 0.884 |
| <b>Sirt5</b> | 0.034  | 0.916 | -0.117 | 0.718 | -0.554 | 0.062 | -0.207 | 0.518 |
| <b>Sirt6</b> | 0.001  | 0.996 | -0.169 | 0.599 | -0.310 | 0.327 | -0.058 | 0.859 |
| <b>Sirt7</b> | -0.366 | 0.242 | -0.304 | 0.336 | 0.191  | 0.552 | -0.018 | 0.956 |

|                  | <b>Imatinib</b> |       | <b>Lomustine</b> |       | <b>Melphalan</b> |       | <b>Methotrexate</b> |       |
|------------------|-----------------|-------|------------------|-------|------------------|-------|---------------------|-------|
| <b>Isoenzyme</b> | R               | p     | R                | p     | R                | p     | R                   | p     |
| <b>HDAC1</b>     | -0.210          | 0.617 | 0.472            | 0.143 | -0.110           | 0.735 | 0.067               | 0.837 |
| <b>HDAC2</b>     | 0.344           | 0.404 | 0.115            | 0.737 | -0.326           | 0.301 | -0.137              | 0.672 |
| <b>HDAC4</b>     | -0.442          | 0.273 | -0.362           | 0.274 | 0.173            | 0.591 | -0.101              | 0.755 |
| <b>HDAC6</b>     | -0.327          | 0.428 | -0.471           | 0.144 | -0.327           | 0.300 | -0.258              | 0.418 |
| <b>Sirt1</b>     | -0.526          | 0.180 | -0.251           | 0.457 | -0.090           | 0.780 | -0.019              | 0.952 |
| <b>Sirt2</b>     | 0.091           | 0.830 | 0.291            | 0.385 | 0.040            | 0.902 | -0.314              | 0.321 |
| <b>Sirt3</b>     | -0.414          | 0.307 | -0.256           | 0.448 | 0.186            | 0.562 | -0.109              | 0.736 |
| <b>Sirt5</b>     | -0.467          | 0.243 | 0.365            | 0.270 | 0.003            | 0.992 | -0.153              | 0.635 |
| <b>Sirt6</b>     | -0.226          | 0.591 | -0.502           | 0.115 | 0.182            | 0.572 | -0.061              | 0.849 |
| <b>Sirt7</b>     | -0.043          | 0.920 | 0.259            | 0.441 | -0.362           | 0.247 | 0.070               | 0.828 |

|                  | <b>Oxaliplatin</b> |       | <b>Podophyllotoxin</b> |       | <b>Taxol</b> |       | <b>Thiotepa</b> |       |
|------------------|--------------------|-------|------------------------|-------|--------------|-------|-----------------|-------|
| <b>Isoenzyme</b> | R                  | p     | R                      | p     | R            | p     | R               | p     |
| <b>HDAC1</b>     | 0.102              | 0.753 | -0.064                 | 0.844 | -0.112       | 0.730 | -0.433          | 0.159 |
| <b>HDAC2</b>     | 0.421              | 0.172 | -0.291                 | 0.358 | -0.217       | 0.497 | -0.444          | 0.148 |
| <b>HDAC4</b>     | 0.614              | 0.034 | 0.164                  | 0.611 | 0.427        | 0.167 | -0.376          | 0.229 |
| <b>HDAC6</b>     | -0.107             | 0.740 | -0.077                 | 0.811 | -0.096       | 0.766 | -0.398          | 0.200 |
| <b>Sirt1</b>     | -0.235             | 0.462 | 0.004                  | 0.990 | -0.044       | 0.892 | -0.327          | 0.299 |
| <b>Sirt2</b>     | -0.185             | 0.565 | -0.364                 | 0.245 | -0.281       | 0.376 | 0.561           | 0.058 |
| <b>Sirt3</b>     | -0.217             | 0.497 | 0.035                  | 0.913 | 0.208        | 0.516 | -0.211          | 0.511 |
| <b>Sirt5</b>     | 0.814              | 0.001 | -0.145                 | 0.653 | 0.024        | 0.941 | -0.210          | 0.513 |
| <b>Sirt6</b>     | -0.524             | 0.080 | 0.094                  | 0.771 | 0.293        | 0.356 | -0.133          | 0.681 |
| <b>Sirt7</b>     | -0.194             | 0.546 | -0.313                 | 0.322 | -0.538       | 0.071 | -0.248          | 0.437 |

|                  | <b>Topotecan</b> |       | <b>Vinblastin</b> |       | <b>Doubling time</b> |       |
|------------------|------------------|-------|-------------------|-------|----------------------|-------|
| <b>Isoenzyme</b> | R                | p     | R                 | p     | R                    | p     |
| <b>HDAC1</b>     | -0.049           | 0.909 | -0.325            | 0.303 | 0.166                | 0.572 |

|              |        |       |        |       |        |       |
|--------------|--------|-------|--------|-------|--------|-------|
| <b>HDAC2</b> | 0.666  | 0.071 | -0.173 | 0.591 | -0.307 | 0.286 |
| <b>HDAC4</b> | 0.660  | 0.075 | -0.199 | 0.536 | -0.261 | 0.368 |
| <b>HDAC6</b> | -0.194 | 0.644 | -0.600 | 0.039 | -0.107 | 0.716 |
| <b>Sirt1</b> | -0.161 | 0.703 | -0.340 | 0.280 | -0.130 | 0.658 |
| <b>Sirt2</b> | -0.259 | 0.536 | -0.229 | 0.474 | 0.495  | 0.072 |
| <b>Sirt3</b> | -0.206 | 0.624 | -0.218 | 0.496 | 0.088  | 0.765 |
| <b>Sirt5</b> | 0.801  | 0.017 | -0.154 | 0.633 | 0.000  | 0.999 |
| <b>Sirt6</b> | -0.496 | 0.211 | -0.012 | 0.970 | -0.178 | 0.544 |
| <b>Sirt7</b> | -0.313 | 0.450 | -0.284 | 0.370 | 0.139  | 0.634 |

**Table S7.** R and p-values of Pearson correlation of HDAC isoenzyme mRNA expression with data of the NCI 60 cancer cell line program with anticancer drug potency expressed as GI<sub>50</sub> values.

|           | Azacitidine |       | Bortezomib |       | Busulfan |       | Camptothecin |       |
|-----------|-------------|-------|------------|-------|----------|-------|--------------|-------|
| Isoenzyme | R           | p     | R          | p     | R        | p     | R            | p     |
| HDAC1     | -0.064      | 0.632 | -0.018     | 0.893 | -0.030   | 0.824 | -0.092       | 0.489 |
| HDAC2     | -0.035      | 0.793 | 0.104      | 0.433 | -0.055   | 0.676 | -0.115       | 0.380 |
| HDAC4     | 0.046       | 0.728 | -0.116     | 0.382 | -0.197   | 0.135 | -0.077       | 0.562 |
| HDAC6     | 0.130       | 0.321 | -0.015     | 0.911 | -0.116   | 0.376 | 0.031        | 0.816 |
| Sirt1     | -0.070      | 0.595 | -0.011     | 0.932 | 0.028    | 0.834 | -0.084       | 0.521 |
| Sirt2     | -0.034      | 0.794 | 0.050      | 0.706 | -0.204   | 0.118 | -0.370       | 0.004 |
| Sirt3     | 0.026       | 0.846 | -0.123     | 0.353 | -0.082   | 0.535 | -0.032       | 0.806 |
| Sirt5     | 0.161       | 0.219 | 0.010      | 0.942 | -0.081   | 0.539 | 0.070        | 0.595 |
| Sirt6     | -0.027      | 0.837 | -0.060     | 0.652 | -0.121   | 0.356 | 0.141        | 0.284 |
| Sirt7     | -0.061      | 0.641 | 0.052      | 0.698 | -0.003   | 0.983 | -0.037       | 0.778 |

|           | Carboplatin |       | Chlorambucil |       | Cisplatin |       | Colchicine |       |
|-----------|-------------|-------|--------------|-------|-----------|-------|------------|-------|
| Isoenzyme | R           | p     | R            | p     | R         | p     | R          | p     |
| HDAC1     | 0.091       | 0.495 | -0.076       | 0.567 | 0.023     | 0.864 | -0.156     | 0.242 |
| HDAC2     | 0.030       | 0.822 | -0.096       | 0.466 | -0.145    | 0.268 | -0.286     | 0.028 |
| HDAC4     | 0.045       | 0.736 | -0.061       | 0.644 | -0.021    | 0.876 | -0.062     | 0.641 |
| HDAC6     | -0.006      | 0.961 | -0.108       | 0.411 | 0.187     | 0.153 | 0.054      | 0.685 |
| Sirt1     | -0.045      | 0.736 | -0.071       | 0.592 | -0.046    | 0.725 | -0.037     | 0.780 |
| Sirt2     | -0.179      | 0.170 | -0.281       | 0.030 | -0.092    | 0.483 | 0.123      | 0.355 |
| Sirt3     | 0.150       | 0.253 | -0.046       | 0.726 | 0.041     | 0.757 | 0.173      | 0.191 |
| Sirt5     | 0.117       | 0.372 | -0.016       | 0.902 | 0.177     | 0.176 | -0.031     | 0.816 |
| Sirt6     | 0.105       | 0.425 | 0.051        | 0.701 | 0.200     | 0.125 | 0.137      | 0.301 |
| Sirt7     | -0.077      | 0.556 | 0.017        | 0.898 | -0.083    | 0.530 | -0.022     | 0.871 |

|           | Doxorubicin |       | Etoposide |       | 5-Fluorouracil |       | Hydroxyurea |       |
|-----------|-------------|-------|-----------|-------|----------------|-------|-------------|-------|
| Isoenzyme | R           | p     | R         | p     | R              | p     | R           | p     |
| HDAC1     | -0.039      | 0.770 | 0.078     | 0.560 | -0.315         | 0.015 | -0.119      | 0.369 |
| HDAC2     | 0.150       | 0.252 | -0.014    | 0.913 | -0.173         | 0.187 | -0.125      | 0.341 |
| HDAC4     | -0.103      | 0.439 | -0.099    | 0.454 | -0.082         | 0.536 | 0.038       | 0.773 |
| HDAC6     | -0.066      | 0.619 | -0.079    | 0.550 | 0.193          | 0.140 | 0.018       | 0.891 |
| Sirt1     | -0.115      | 0.381 | -0.202    | 0.122 | -0.127         | 0.333 | -0.016      | 0.906 |

|              |        |       |        |       |        |       |        |       |
|--------------|--------|-------|--------|-------|--------|-------|--------|-------|
| <b>Sirt2</b> | 0.030  | 0.819 | 0.051  | 0.701 | -0.162 | 0.215 | -0.171 | 0.192 |
| <b>Sirt3</b> | -0.144 | 0.271 | -0.151 | 0.248 | -0.003 | 0.985 | 0.000  | 0.999 |
| <b>Sirt5</b> | -0.013 | 0.919 | -0.198 | 0.130 | 0.112  | 0.396 | -0.055 | 0.677 |
| <b>Sirt6</b> | -0.126 | 0.336 | -0.315 | 0.014 | 0.018  | 0.889 | 0.034  | 0.795 |
| <b>Sirt7</b> | -0.143 | 0.275 | 0.000  | 0.999 | -0.135 | 0.302 | -0.083 | 0.531 |

|                  | <b>Imatinib</b> |       | <b>Lomustine</b> |       | <b>Melphalan</b> |       | <b>Methotrexate</b> |       |
|------------------|-----------------|-------|------------------|-------|------------------|-------|---------------------|-------|
| <b>Isoenzyme</b> | R               | p     | R                | p     | R                | p     | R                   | p     |
| <b>HDAC1</b>     | -0.235          | 0.073 | -0.149           | 0.259 | -0.090           | 0.499 | -0.322              | 0.013 |
| <b>HDAC2</b>     | 0.015           | 0.910 | -0.127           | 0.332 | -0.055           | 0.675 | -0.187              | 0.153 |
| <b>HDAC4</b>     | -0.091          | 0.493 | -0.153           | 0.246 | -0.125           | 0.347 | -0.086              | 0.519 |
| <b>HDAC6</b>     | -0.178          | 0.177 | -0.272           | 0.035 | -0.203           | 0.120 | -0.017              | 0.896 |
| <b>Sirt1</b>     | -0.020          | 0.883 | -0.320           | 0.013 | -0.161           | 0.220 | -0.131              | 0.320 |
| <b>Sirt2</b>     | 0.142           | 0.285 | -0.149           | 0.255 | -0.254           | 0.050 | -0.071              | 0.587 |
| <b>Sirt3</b>     | 0.102           | 0.444 | -0.030           | 0.818 | -0.063           | 0.633 | -0.002              | 0.987 |
| <b>Sirt5</b>     | 0.072           | 0.590 | -0.121           | 0.359 | -0.047           | 0.720 | -0.088              | 0.504 |
| <b>Sirt6</b>     | -0.166          | 0.208 | -0.209           | 0.109 | 0.038            | 0.776 | -0.101              | 0.442 |
| <b>Sirt7</b>     | 0.062           | 0.644 | 0.189            | 0.148 | 0.020            | 0.882 | -0.178              | 0.172 |

|                  | <b>Oxaliplatin</b> |       | <b>Paclitaxel</b> |       | <b>Thiotepa</b> |       | <b>Topotecan</b> |       |
|------------------|--------------------|-------|-------------------|-------|-----------------|-------|------------------|-------|
| <b>Isoenzyme</b> | R                  | p     | R                 | p     | R               | p     | R                | p     |
| <b>HDAC1</b>     | -0.192             | 0.144 | -0.091            | 0.491 | -0.093          | 0.486 | -0.171           | 0.196 |
| <b>HDAC2</b>     | -0.136             | 0.304 | 0.129             | 0.327 | -0.168          | 0.200 | -0.200           | 0.125 |
| <b>HDAC4</b>     | -0.086             | 0.516 | -0.136            | 0.305 | -0.065          | 0.625 | -0.055           | 0.680 |
| <b>HDAC6</b>     | 0.206              | 0.118 | -0.118            | 0.371 | -0.009          | 0.947 | 0.001            | 0.991 |
| <b>Sirt1</b>     | 0.022              | 0.866 | -0.158            | 0.227 | -0.056          | 0.672 | -0.090           | 0.492 |
| <b>Sirt2</b>     | -0.284             | 0.029 | 0.051             | 0.700 | -0.283          | 0.029 | -0.331           | 0.010 |
| <b>Sirt3</b>     | -0.048             | 0.716 | -0.134            | 0.309 | 0.008           | 0.951 | -0.041           | 0.757 |
| <b>Sirt5</b>     | 0.157              | 0.234 | -0.044            | 0.740 | -0.046          | 0.729 | 0.050            | 0.704 |
| <b>Sirt6</b>     | 0.095              | 0.474 | -0.218            | 0.094 | 0.006           | 0.965 | 0.089            | 0.501 |
| <b>Sirt7</b>     | -0.090             | 0.497 | -0.181            | 0.166 | -0.066          | 0.615 | -0.061           | 0.641 |

|                  | <b>Trichostatin A</b> |       | <b>Vorinostat</b> |       |  |  |  |  |
|------------------|-----------------------|-------|-------------------|-------|--|--|--|--|
| <b>Isoenzyme</b> | R                     | p     | R                 | p     |  |  |  |  |
| <b>HDAC1</b>     | -0.396                | 0.161 | -0.264            | 0.362 |  |  |  |  |

|              |        |       |        |       |  |  |  |  |
|--------------|--------|-------|--------|-------|--|--|--|--|
| <b>HDAC2</b> | 0.308  | 0.285 | 0.278  | 0.336 |  |  |  |  |
| <b>HDAC4</b> | 0.315  | 0.273 | 0.387  | 0.171 |  |  |  |  |
| <b>HDAC6</b> | -0.280 | 0.332 | -0.031 | 0.916 |  |  |  |  |
| <b>Sirt1</b> | -0.479 | 0.083 | -0.398 | 0.158 |  |  |  |  |
| <b>Sirt2</b> | 0.020  | 0.946 | 0.015  | 0.959 |  |  |  |  |
| <b>Sirt3</b> | -0.418 | 0.137 | -0.389 | 0.169 |  |  |  |  |
| <b>Sirt5</b> | 0.179  | 0.539 | 0.106  | 0.718 |  |  |  |  |
| <b>Sirt6</b> | -0.371 | 0.192 | -0.468 | 0.092 |  |  |  |  |
| <b>Sirt7</b> | -0.333 | 0.244 | -0.217 | 0.456 |  |  |  |  |

**Table S8.** Localization of HDAC isoenzymes across the chromosomes and corresponding reference sequence; from on UCSC Genome Browser.

| Isoenzyme | Localisation | RefSeq       |
|-----------|--------------|--------------|
| HDAC1     | 1p35.2-p35.1 | NM_004964    |
| HDAC2     | 6q21         | NM_001527    |
| HDAC4     | 2q37.3       | NM_006037    |
| HDAC6     | Xp11.23      | MN_006044    |
| Sirt1     | 10q21.3      | NM_012238    |
| Sirt2     | 19q13.2      | NM_034146    |
| Sirt3     | 11p15.5      | NM_001370314 |
| Sirt5     | 6p24.1       | NM_012241    |
| Sirt6     | 19p13.3      | NM_016539    |
| Sirt7     | 17q25.3      | NM_016538    |

**Figure S1.** Representative electropherogram showing the total protein content of the panel of 17 cancer cell lines used as internal controls in all Western blotting, as developed according to the TGX Stain Free Gels systems from Bio-Rad. Below are pre-stained protein-ladder, Page ruler <sup>™</sup> from Thermo Fisher #26616.

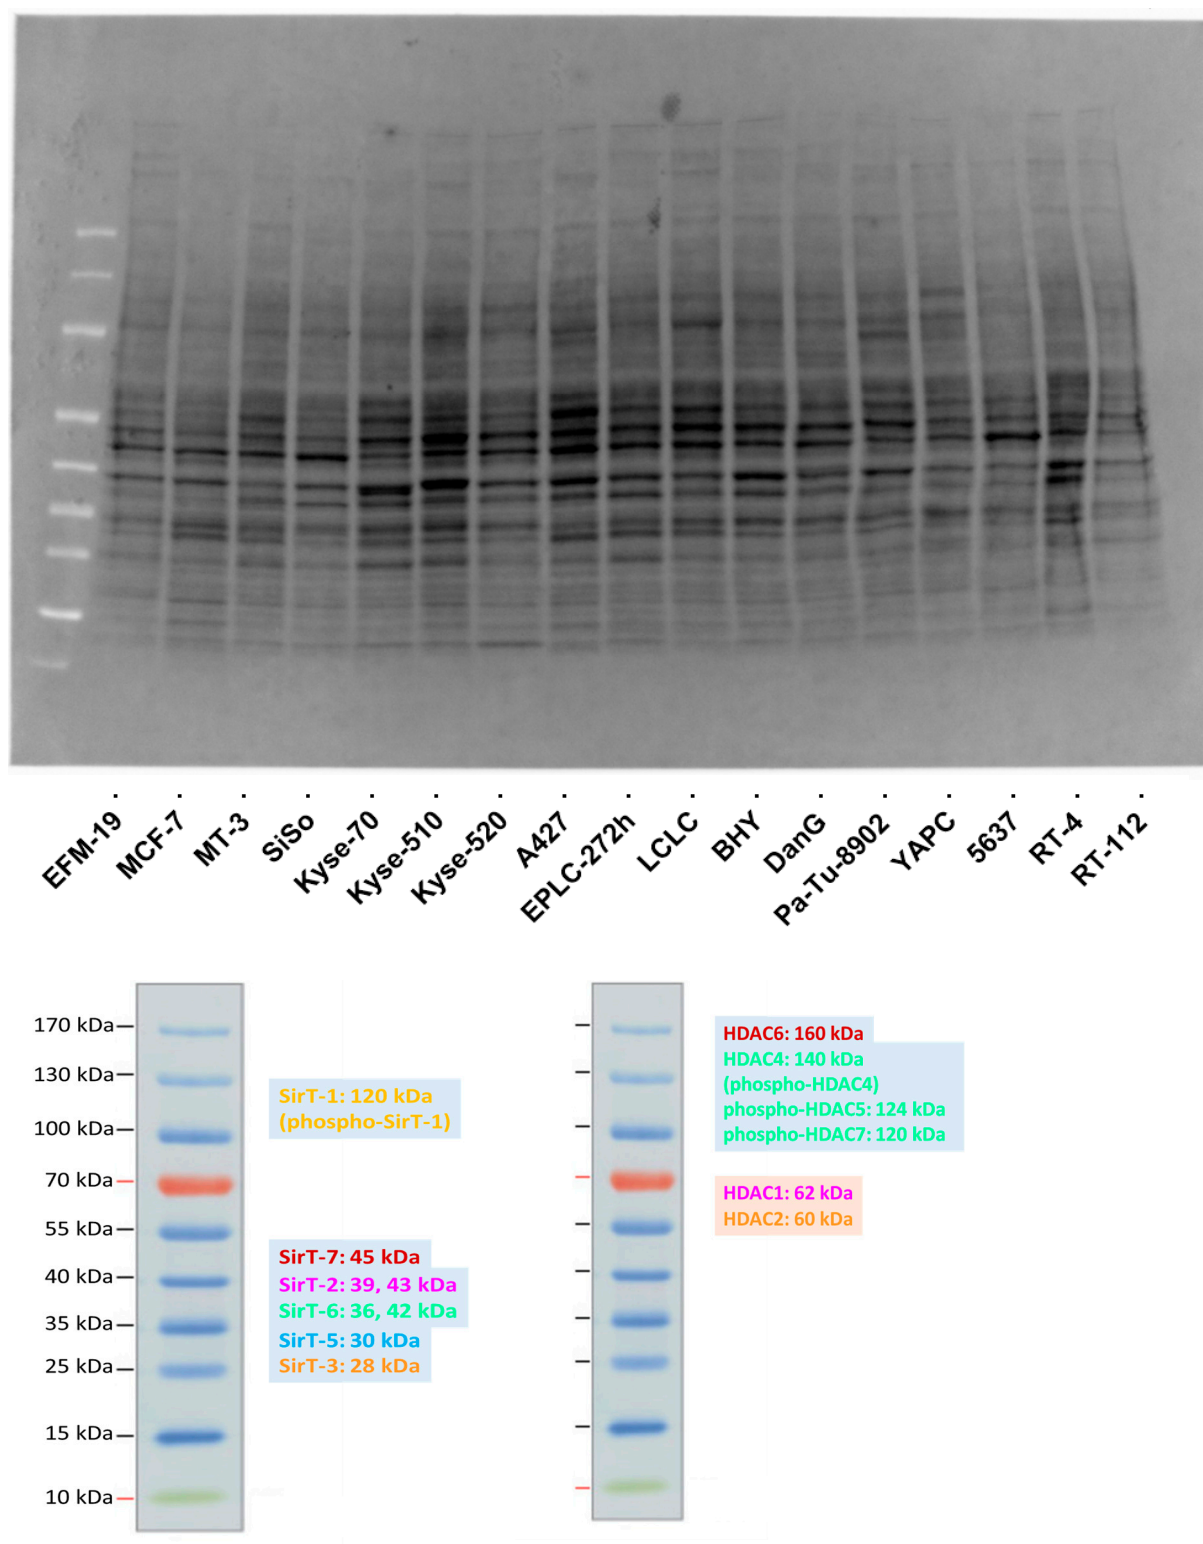

**Figure S2.** Western blots for the panel of 17 cancer cell lines for HDAC1, marked with antibody #5356 from Cell Signaling Technology (below: manufacture's quality control blot). Arrow indicates the band used for the analysis. The order of cell lines is shown in Figure S1.

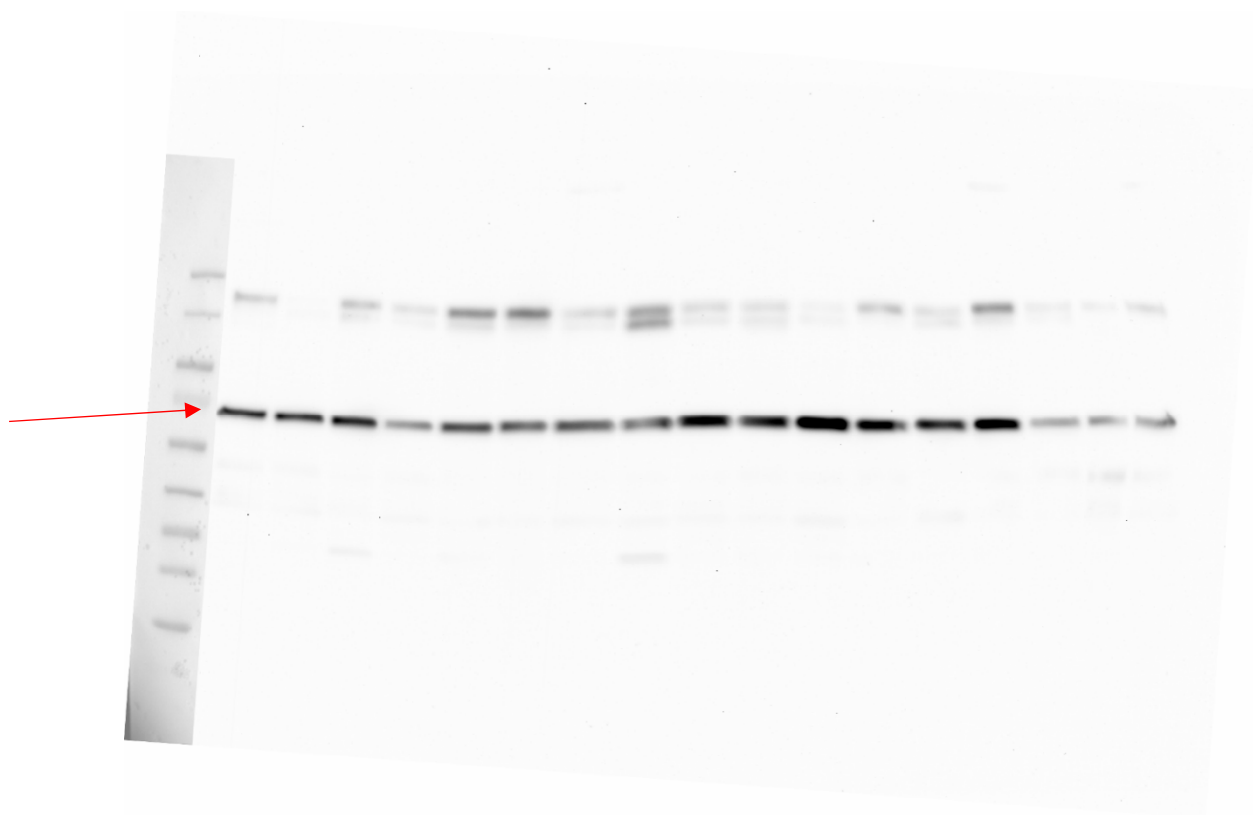

#5356

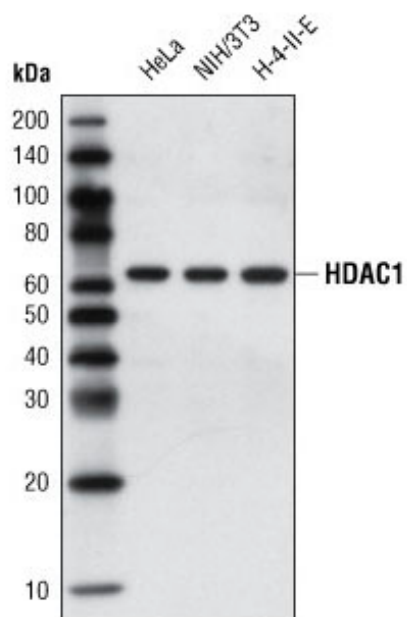



**Figure S3.** Western blots for the panel of 17 cancer cell lines for HDAC2, marked with antibody #5113 from Cell Signaling Technology (below: manufacture's quality control blot). Arrow indicates the band used for the analysis. The order of cell lines is shown in Figure S1.

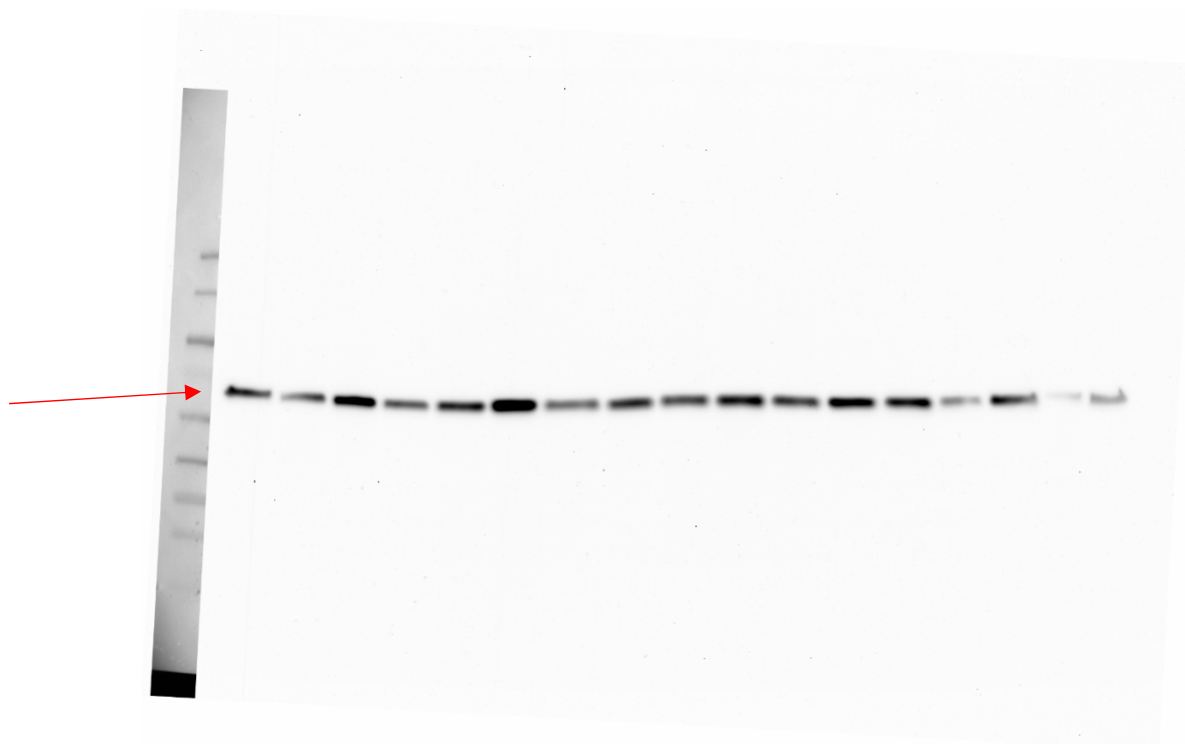

#5113

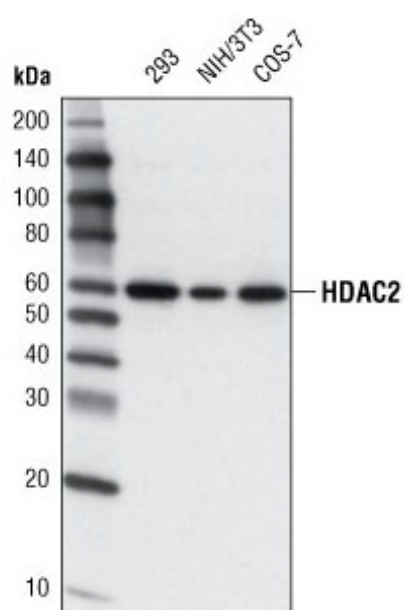

**Figure S4.** Western blots for the panel of 17 cancer cell lines for HDAC4, marked with antibody #7628 from Cell Signaling Technology (below: manufacture's quality control blot). Arrow indicates the band used for the analysis. The order of cell lines is shown in Figure S1.

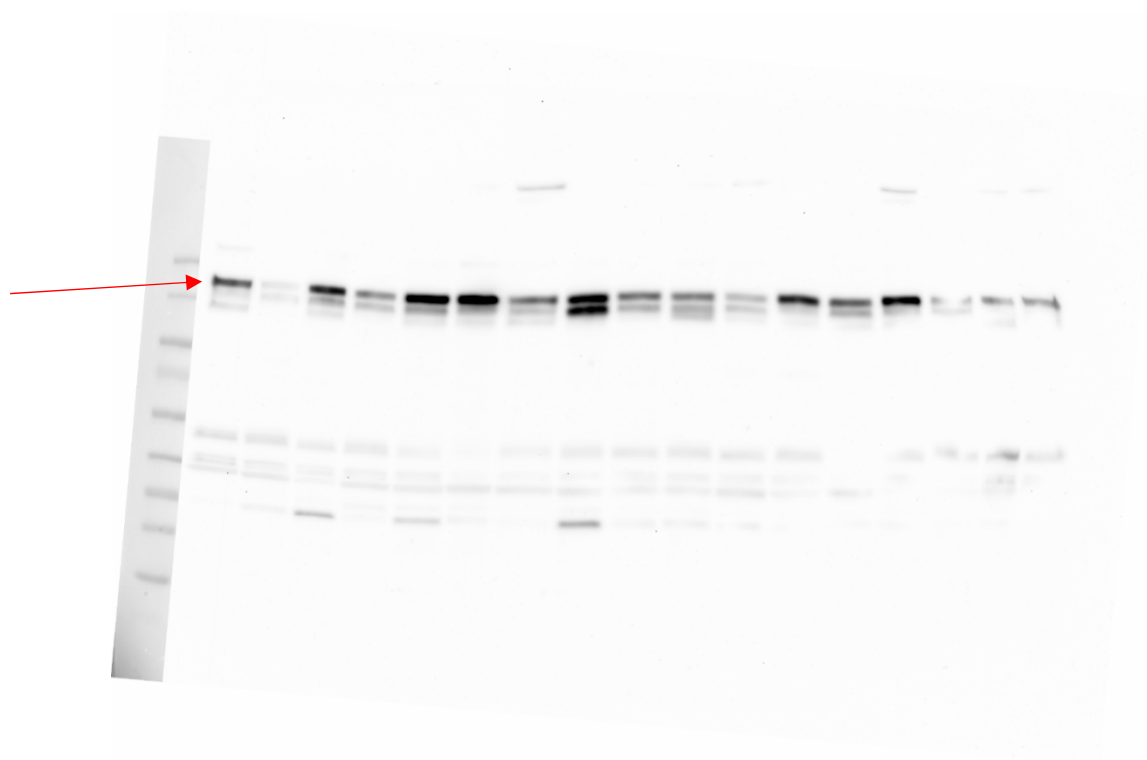

#7628

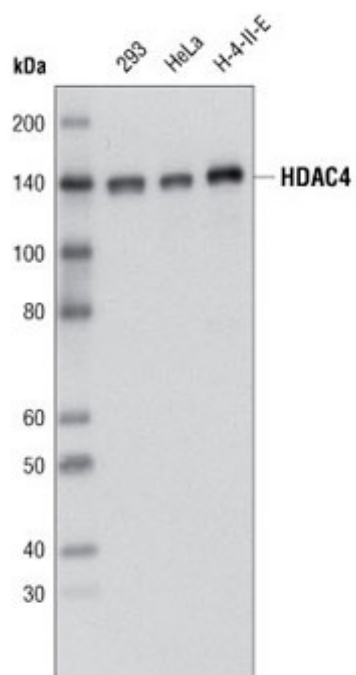

**Figure S5.** Western blots for the panel of 17 cancer cell lines for HDAC6, marked with antibody #7558 from Cell Signaling Technology (below: manufacture's quality control blot). Arrow indicates the band used for the analysis. The order of cell lines is shown in Figure S1.

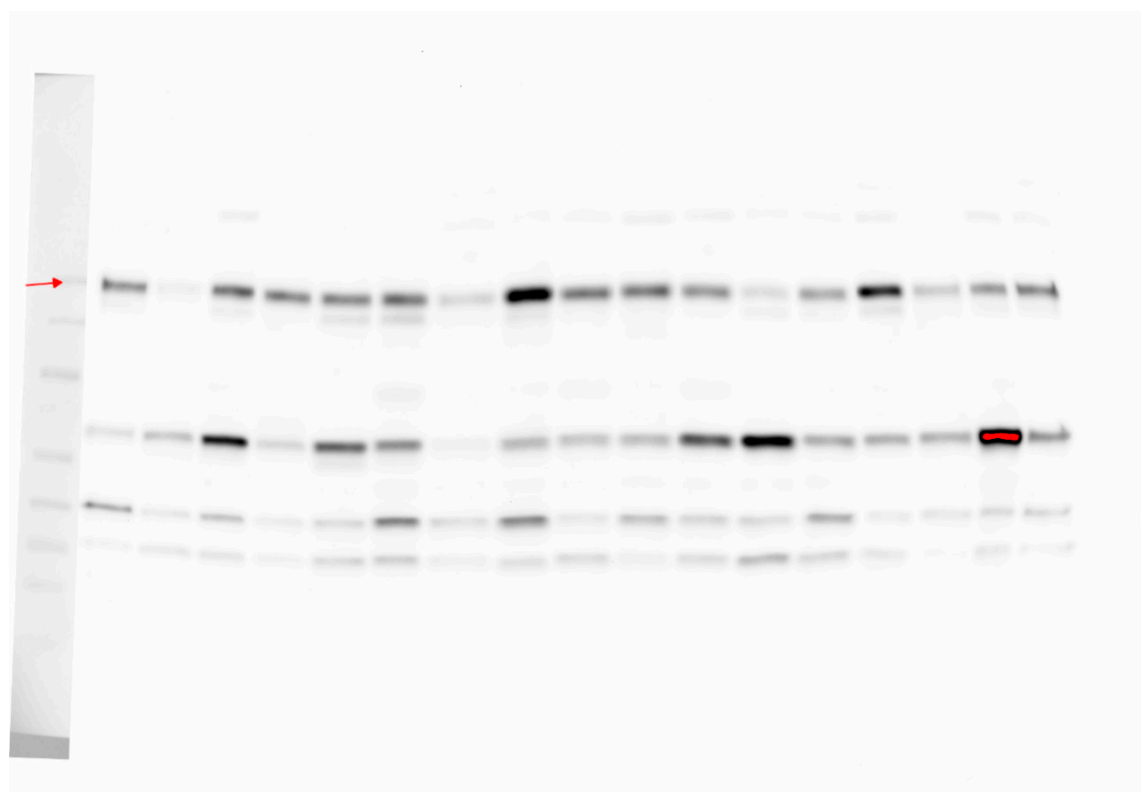

#7558

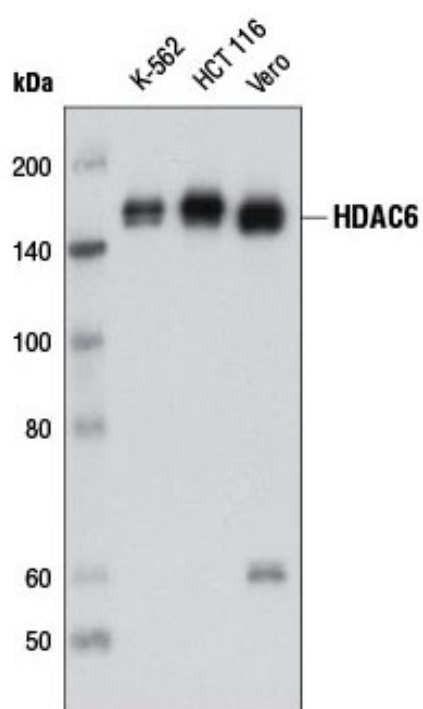

**Figure S6.** Western blots for the panel of 17 cancer cell lines for Sirt1, marked with antibody #9475 from Cell Signaling Technology (below: manufacture's quality control blot). Arrow indicates the band used for the analysis. The order of cell lines is shown in Figure S1.

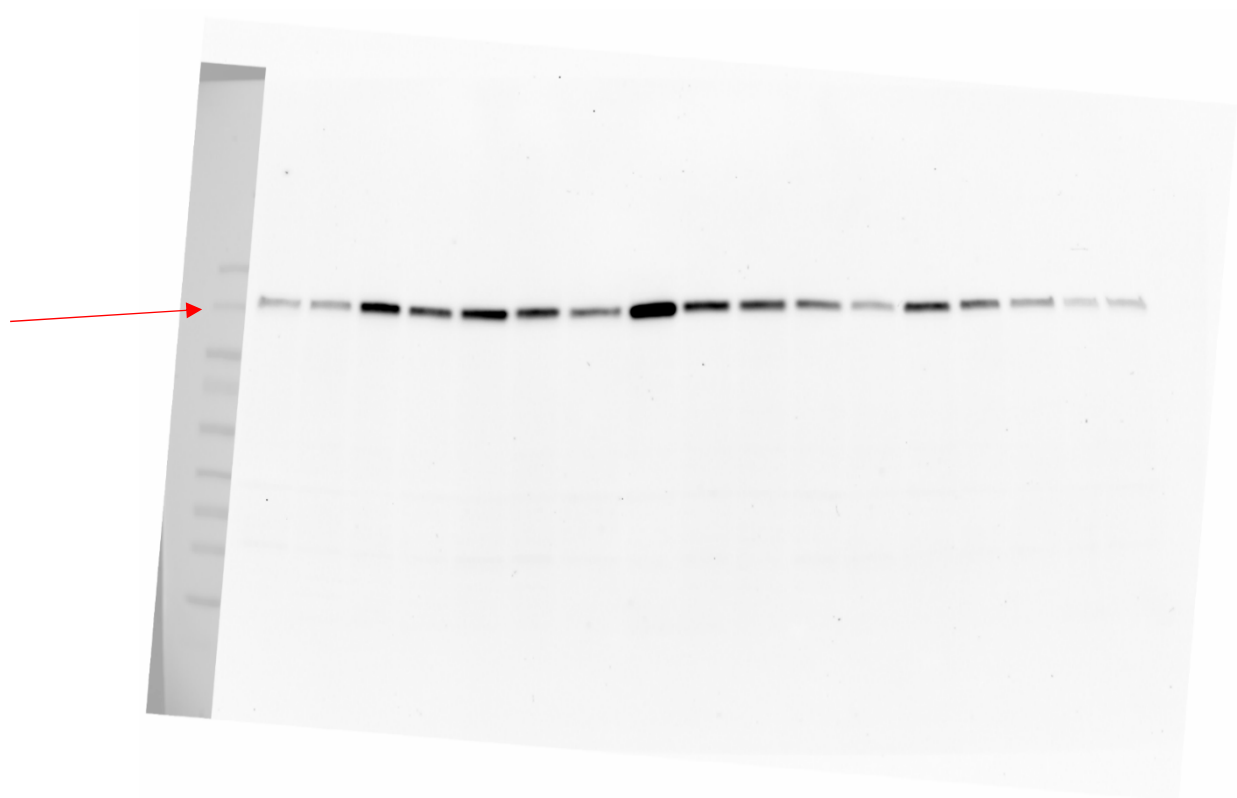

#9475

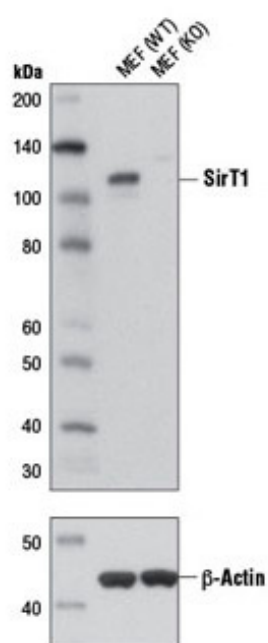

**Figure S7.** Western blots for the panel of 17 cancer cell lines for Sirt2, marked with antibody #12650 from Cell Signaling Technology (below: manufacture's quality control blot). Arrows indicate the bands used for the analysis. The order of cell lines is shown in Figure S1.

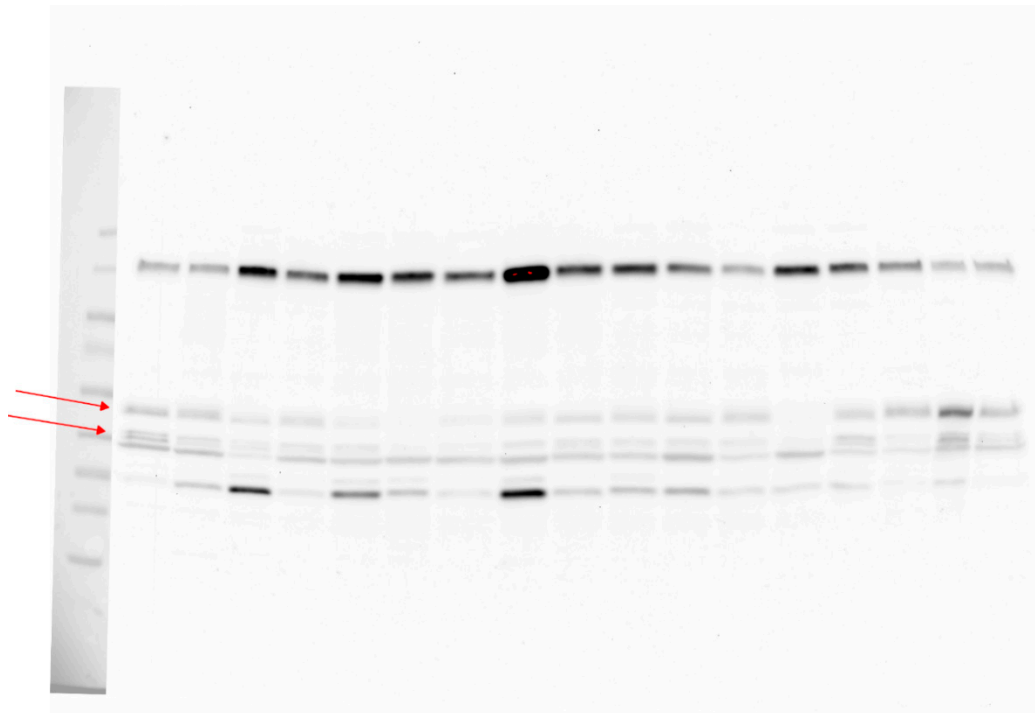

#12650

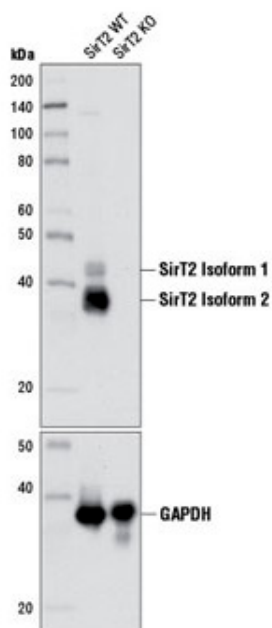

**Figure S8.** Western blots for the panel of 17 cancer cell lines for Sirt3, marked with antibody #5490 from Cell Signaling Technology (below: manufacture’s quality control blots). Arrow indicates the band used for the analysis. The order of cell lines is shown in Figure S1.

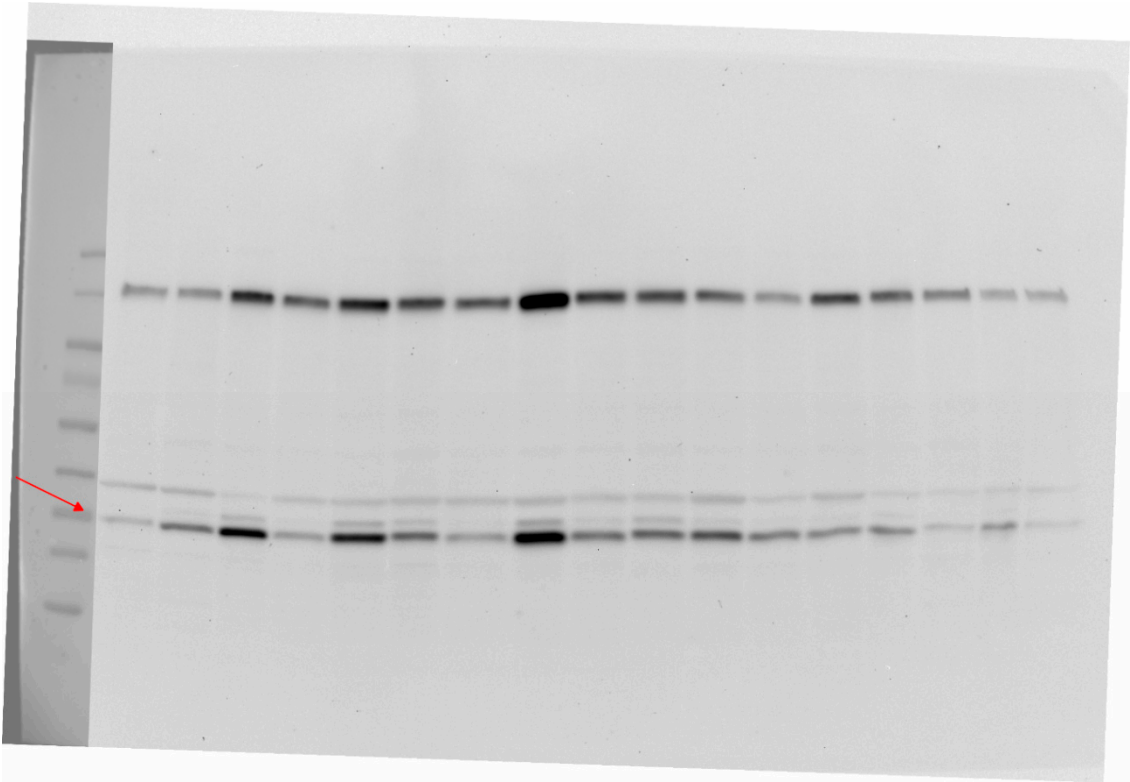

#5490

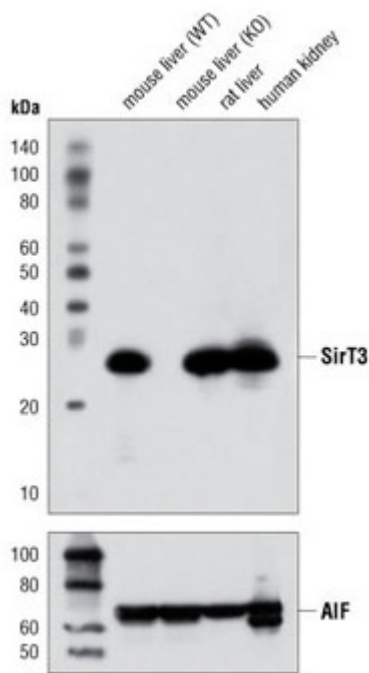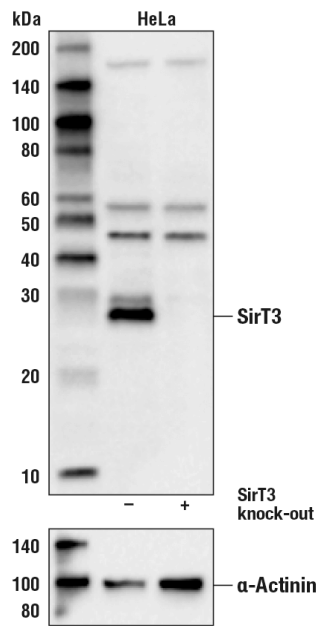

**Figure S9.** Western blots for the panel of 17 cancer cell lines for Sirt5, marked with antibody #8782 from Cell Signaling Technology (below: manufacture's quality control blot). Arrow indicates the band used for the analysis. The order of cell lines is shown in Figure S1.

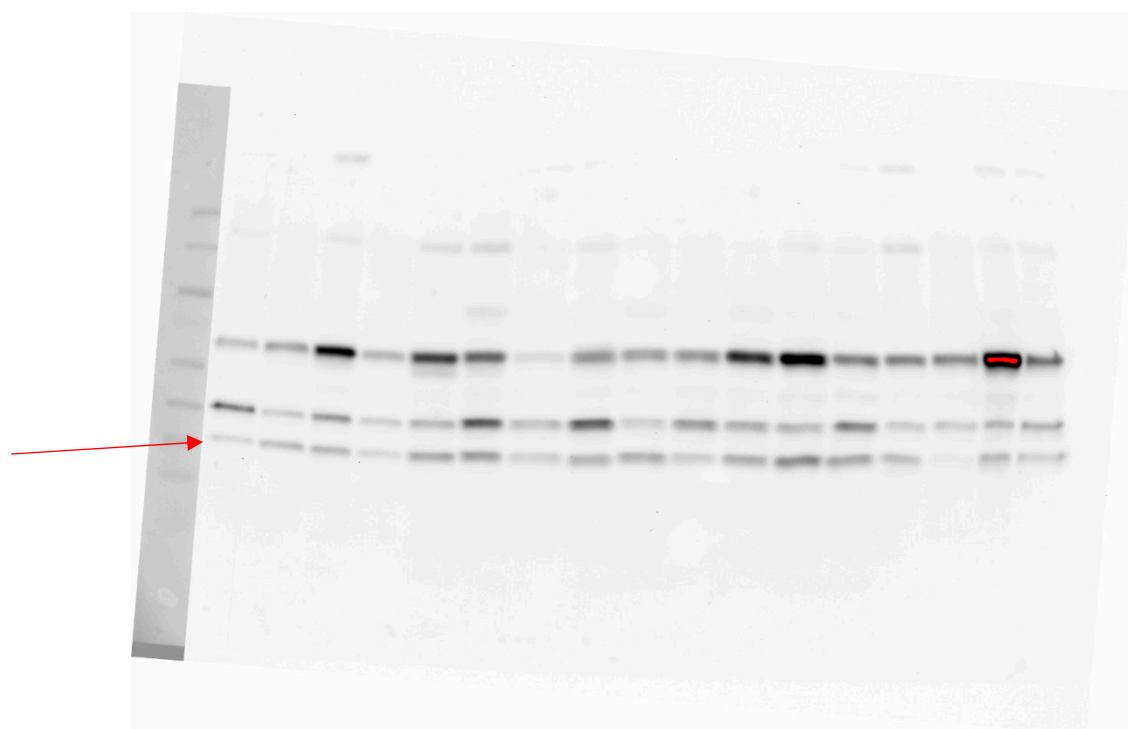

#8782

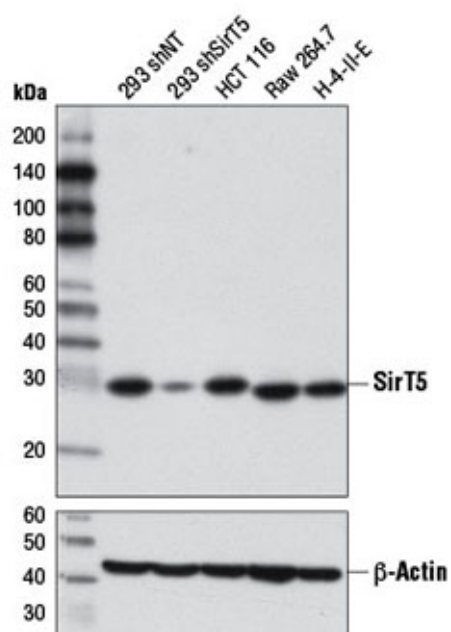

**Figure S10.** Western blots for the panel of 17 cancer cell lines for Sirt6, marked with antibody #12486 from Cell Signaling Technology (below: manufacture’s quality control blots). Arrows indicate the bands used for the analysis. The order of cell lines is shown in Figure S1.

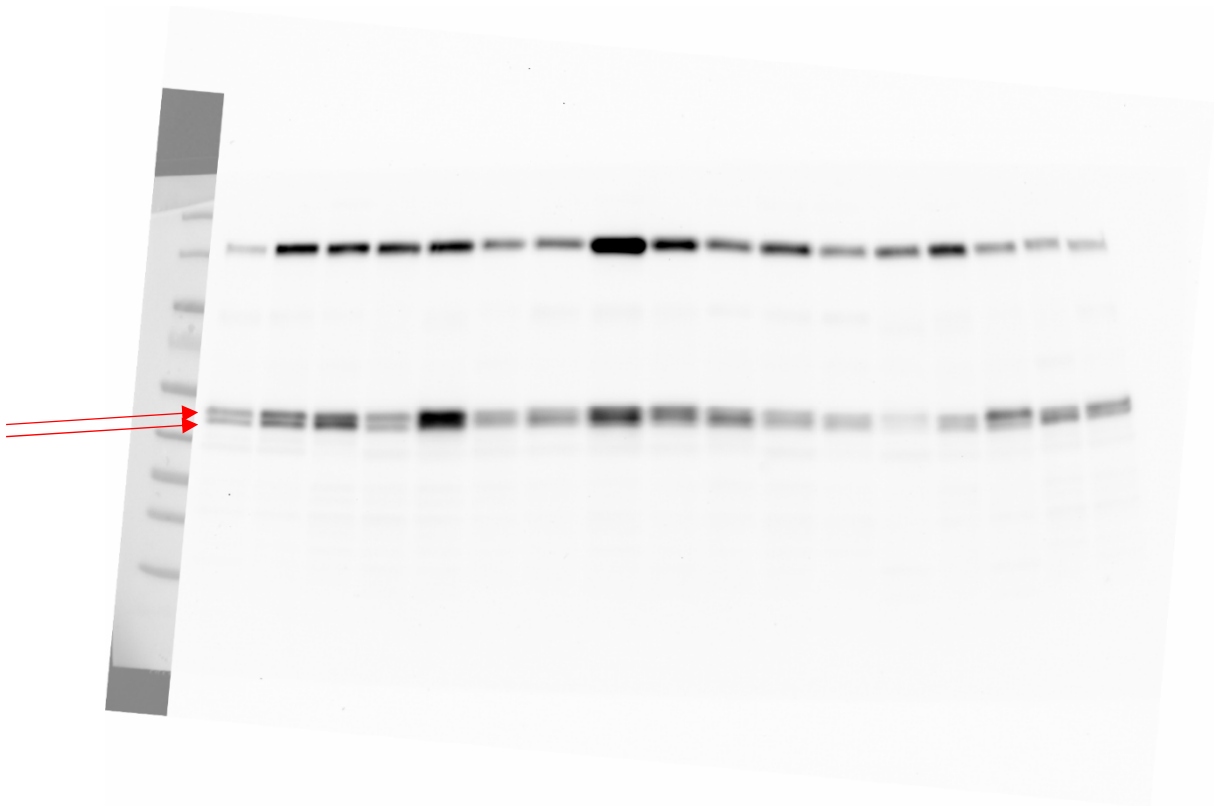

#12486

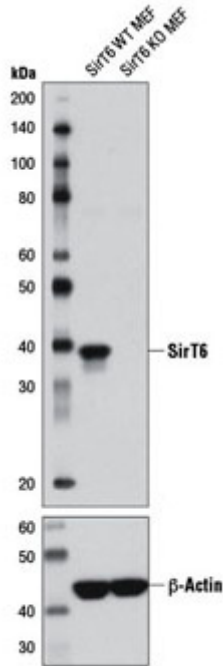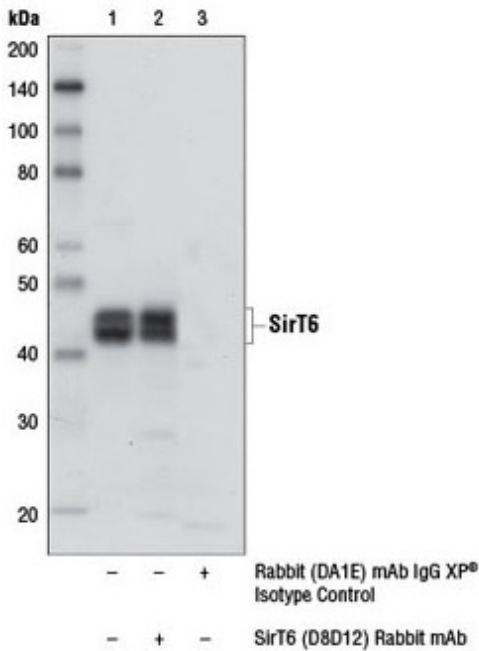



**Figure S11.** Western blots for the panel of 17 cancer cell lines for Sirt7, marked with antibody #5360 from Cell Signaling Technology (below: manufacture's quality control blot). Arrow indicates the band used for the analysis. The order of cell lines is shown in Figure S1.

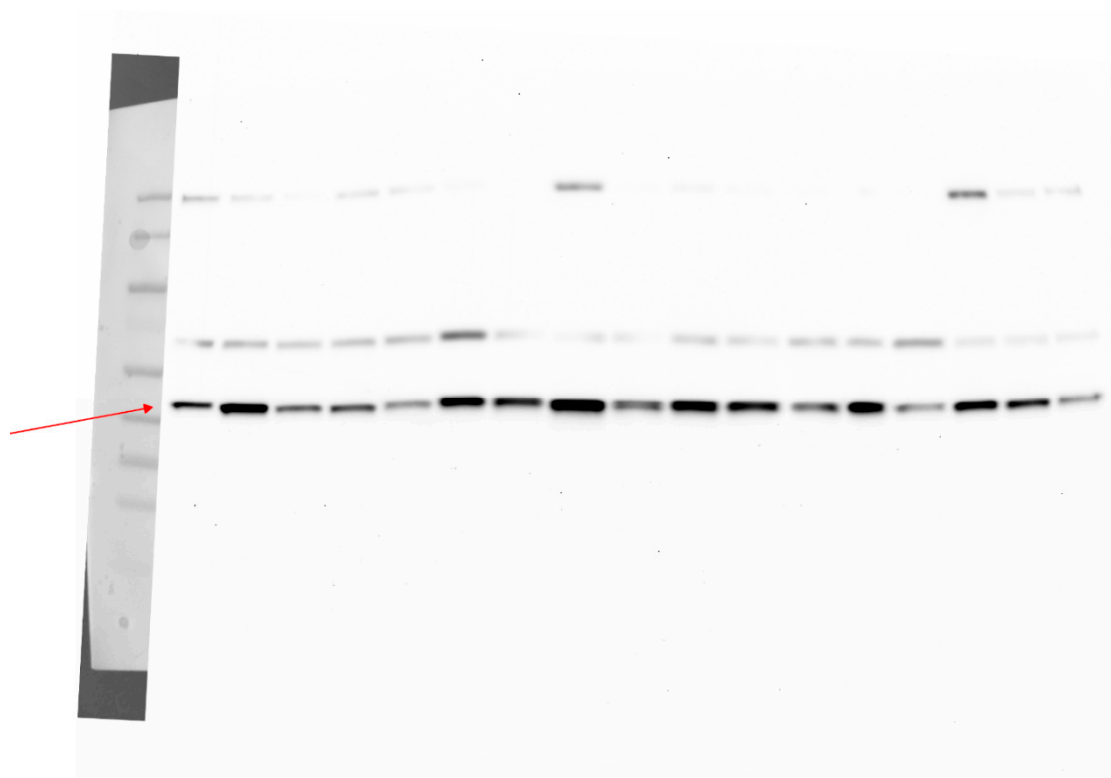

#5360

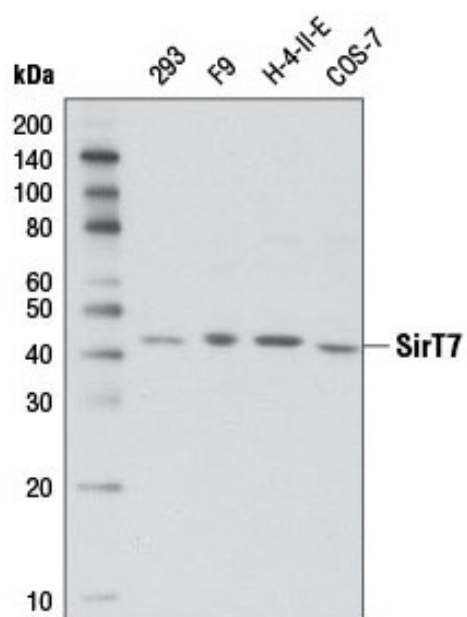

**Figure S12.** Univariate correlation matrix of the Spearman correlation coefficients for the expression of HDAC/Sirt isoenzyme proteins [statistics: ◆  $p < 0.05$ , ● not significant]. Positive correlations are depicted in blue, negative in red (see scale-bar).

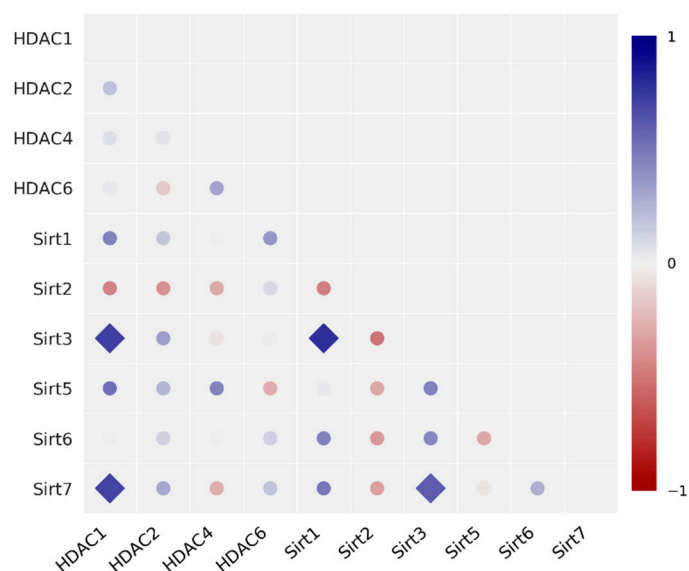

**Figure S13.** Univariate correlation matrix of the Spearman correlation coefficients with the NCI data for the expression of HDAC/Sirt isoenzyme mRNA [statistics: ◆  $p < 0.05$ , ● not significant]. Positive correlations are depicted in blue, negative in red (see scale-bar).

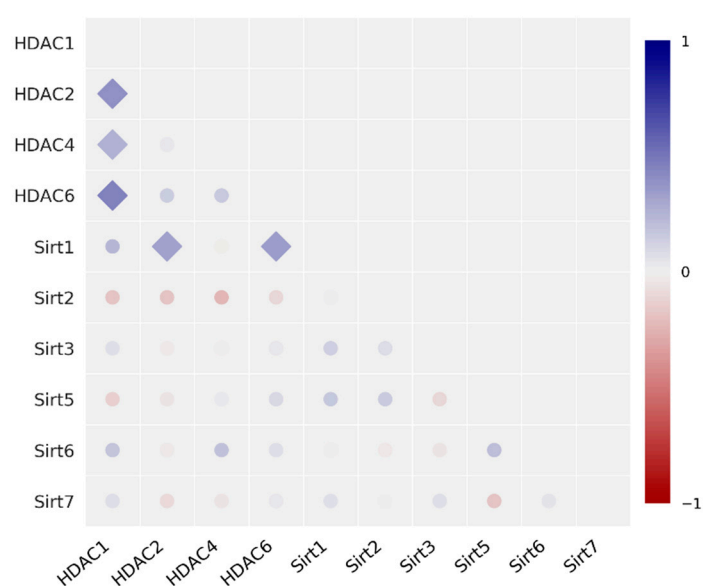

**Figure S14.** Univariate correlation matrix of the Spearman correlation coefficients for the expression of the HDAC/Sirt isoenzyme protein with anticancer drug potency expressed as GI<sub>50</sub> values and the doubling time of cancer cells [statistics: ◆ p<0.05, ● not significant]. Positive correlations are depicted in blue, negative in red (see scale-bar).

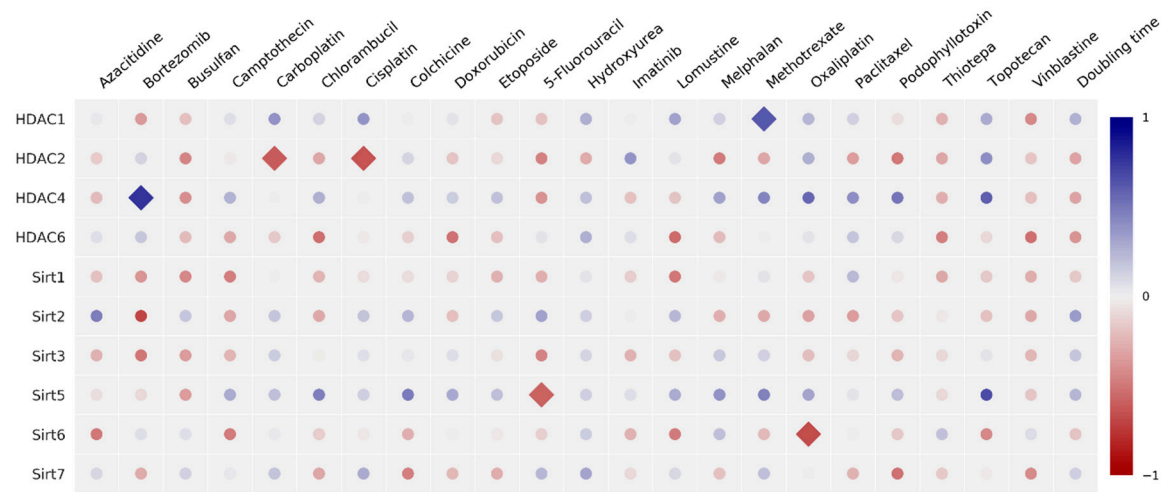

**Figure S15.** Univariate correlation matrix of the Spearman correlation coefficients correlation coefficients with the NCI data for the expression of the HDAC/Sirt isoenzyme mRNA with anticancer drug potency expressed as GI<sub>50</sub> [statistics: ◆ p<0.05, ● not significant]. Positive correlations are depicted in blue, negative in red (see scale-bar).

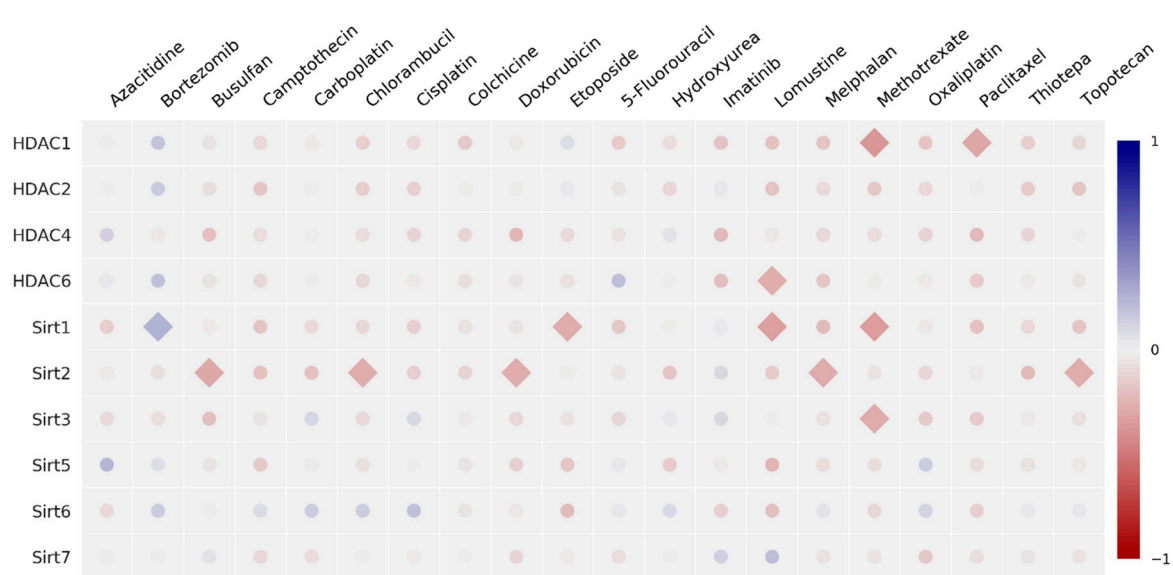

**Figure S16.** Univariate correlation matrix of the Pearson with FDR correction correlation for the expression of HDAC/Sirt isoenzyme proteins.

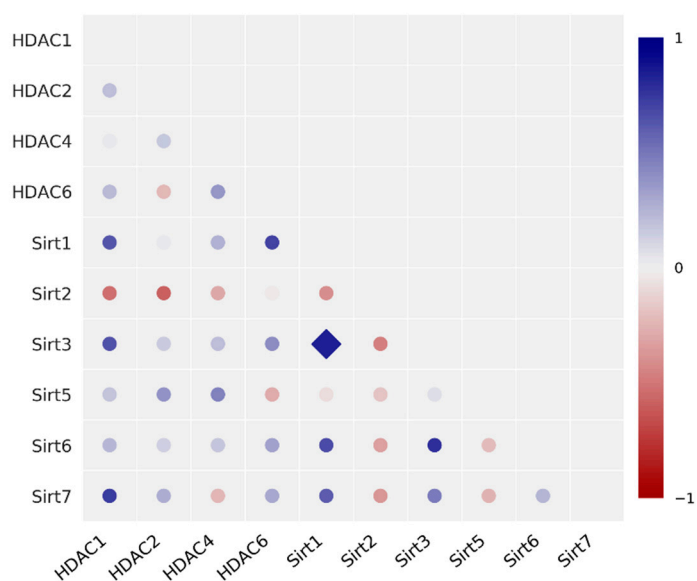

**Figure S17.** Univariate correlation matrix of the Pearson with FDR correction correlation with the NCI data for the expression of HDAC/Sirt isoenzyme mRNA.

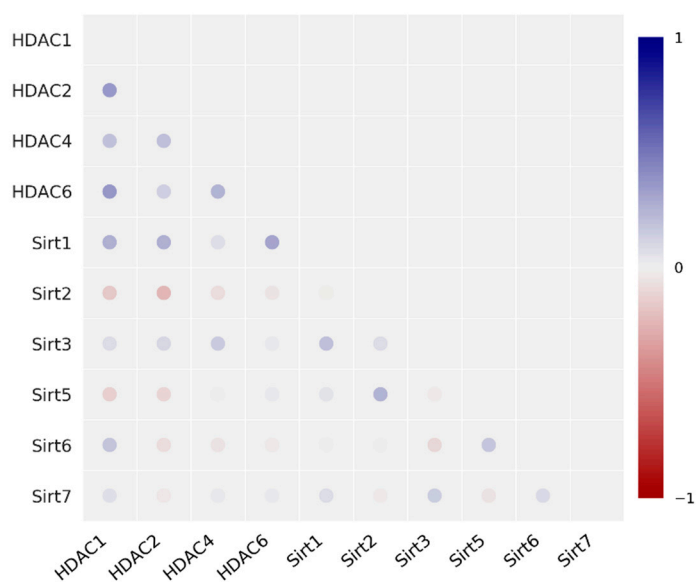

**Figure S18.** Univariate correlation matrix of the Pearson with FDR correction correlation for the expression of the HDAC/Sirt isoenzyme protein with anticancer drug potency expressed as  $GI_{50}$  values and the doubling time of cancer cells [statistics: ◆  $p < 0.05$ , ● not significant]. Positive correlations are depicted in blue, negative in red (see scale-bar).

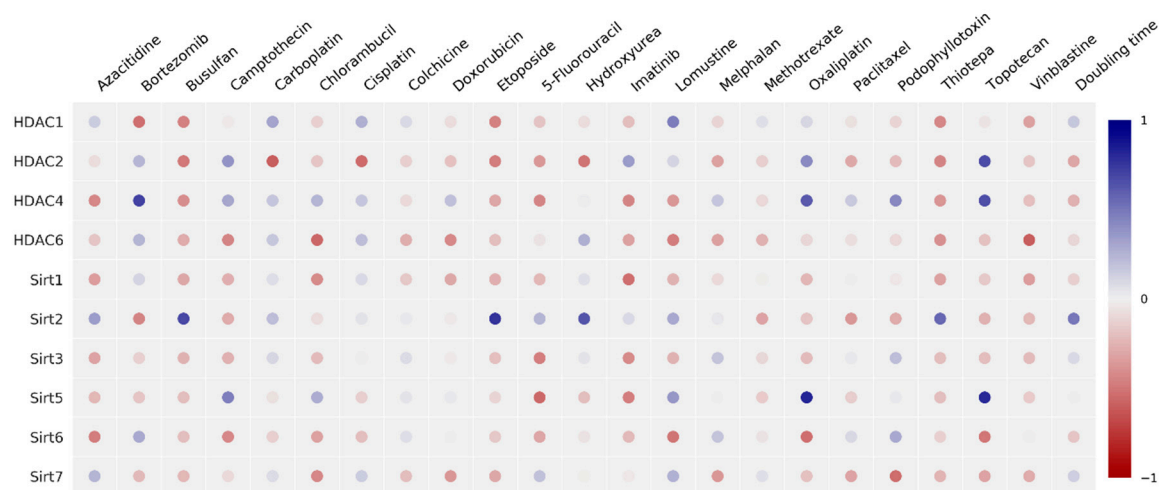

**Figure S19.** Univariate correlation matrix of the Pearson with FDR correction correlation for the expression of the HDAC/Sirt isoenzyme protein with anticancer drug potency expressed as  $GI_{50}$  [statistics: ◆  $p < 0.05$ , ● not significant]. Positive correlations are depicted in blue, negative in red (see scale-bar).

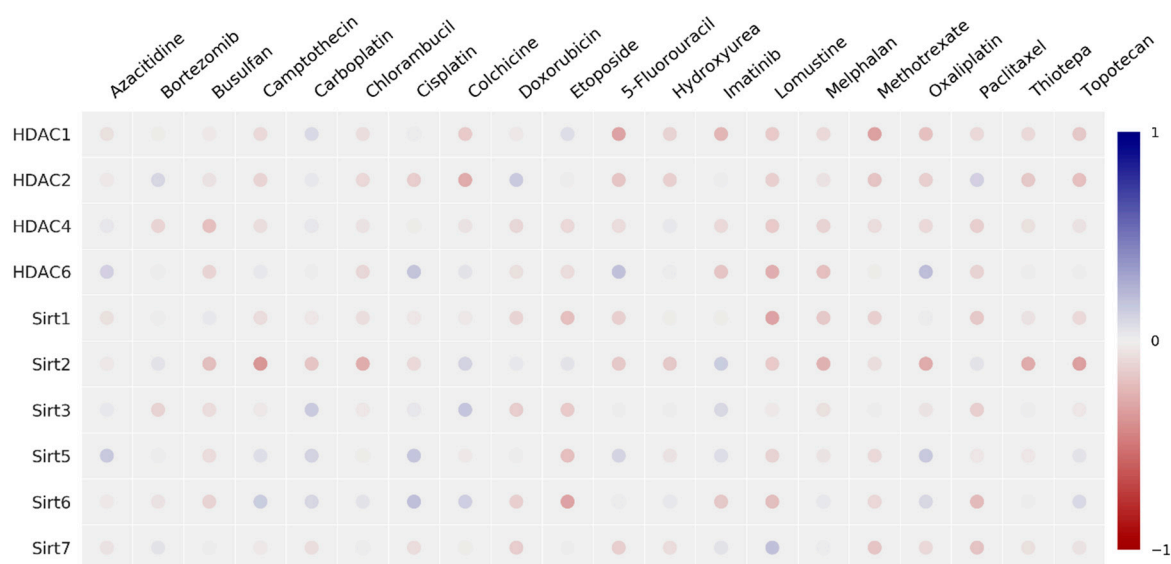

Supplement: s1 [file s1]
